## C/D-box snoRNA-derived RNA production is associated with malignant transformation and metastatic progression in prostate cancer

Elena S. Martens-Uzunova<sup>1</sup>, Youri Hoogstrate<sup>1</sup>, Anton Kalsbeek<sup>1</sup>, Bas Pigmans<sup>1</sup>, Mirella Vredendregt-van den Berg<sup>1</sup>, Natasja Dits<sup>1</sup>, Søren Jensby Nielsen<sup>2,3</sup>, Adam Baker<sup>2,4</sup>, Tapio Visakorpi<sup>5</sup>, Chris Bangma<sup>1</sup> and Guido Jenster<sup>1</sup>

<sup>1</sup> Department of Urology, Erasmus MC, Rotterdam, The Netherlands

<sup>2</sup> Exiqon A/S, Vedbaek, Denmark

<sup>3</sup> Nuevolution A/S, Copenhagen, Denmark

<sup>4</sup> Chr. Hansen A/S, Hørsholm, Denmark

<sup>5</sup> Institute of Biosciences and Medical Technology - BioMediTech, University of Tampere and Tampere University Hospital, Tampere, Finland

**Correspondence to:** Elena Martens-Uzunova, **email:** e.martens@erasmusmc.nl

**Keywords:** snoRNA, sdRNA, SNORD78, GAS5, prostate cancer

**Received:** February 05, 2015

**Accepted:** May 02, 2015

**Published:** May 19, 2015

This is an open-access article distributed under the terms of the Creative Commons Attribution License, which permits unrestricted use, distribution, and reproduction in any medium, provided the original author and source are credited.

### ABSTRACT

**Small nucleolar RNAs (snoRNAs) are dynamically regulated in different tissues and affected in disease. SnoRNAs are processed further to stable smaller RNAs. We sequenced the small RNA transcriptome of prostate cancer (PCa) at different PCa stages and generated a quantified catalogue of 3927 small non-coding RNAs (sncRNAs) detected in normal and malignant prostate tissue. From these, only 1524 are microRNAs. The remaining 2401 sncRNAs represent stable sncRNAs species that originate from snoRNA, tRNA and other sncRNAs. We show that snoRNA-derived RNAs (sdRNAs) display stronger differential expression than microRNAs and are massively upregulated in PCa. SdRNAs account for at least one third of all small RNAs with expression changes in tumor compared to normal adjacent tissue. Multiple sdRNAs can be produced from one snoRNA in a manner related to the conservation of structural snoRNA motifs. Q-PCR analysis in an independent patient cohort (n=106) confirmed the processing patterns of selected snoRNAs (*SNORD44*, *SNORD78*, *SNORD74* and *SNORD81*) and the cancer-associated up-regulation of their sdRNAs observed in sequencing data. Importantly, expression of *SNORD78* and its sdRNA is significantly higher in a subset of patients that developed metastatic disease demonstrating that snoRNA and sdRNAs may present as novel diagnostic and/or prognostic biomarkers for PCa.**

### INTRODUCTION

Malignant transformation and cancer progression cause changes in the expression and function of microRNAs (miRNAs) [1, 2]. However, the effects of these processes on other small non-coding RNAs (sncRNAs) are less understood. Recently, we demonstrated the abundance and differential expression of small nucleolar RNA-derived RNAs (sdRNAs) in the small transcriptome of prostate cancer (PCa) [3]. It is

generally accepted that small nucleolar RNAs (snoRNAs) are housekeeping, protein-noncoding molecules that associate with specific sets of proteins to maintain proper ribosomal maturation in the nucleolus.

Still, several reports show that snoRNAs have tissue-specific expression [4, 5], and may present as novel cancer biomarkers. For example, the H/ACA-box snoRNA SNORA42 is commonly overexpressed in non-small cell lung cancer (NSCLC) and its expression is significantly inversely correlated with survival [6, 7].

Similarly, the levels of C/D-box snoRNAs SNORD33, SNORD66 and SNORD76 are significantly elevated in plasma from NSCLC patients compared with cancer-free controls and can provide potential biomarkers for early detection [8]. In chronic lymphocytic leukemia (CLL), heterogeneous snoRNA expression patterns discriminate major CLL subgroups and can stratify patients in different prognostic groups [9], while in multiple myeloma snoRNA expression patterns are associated with distinct molecular subtypes of the disease [10].

Furthermore, recent research demonstrates that the molecular alterations of snoRNA are functionally linked to basic cellular processes associated with cancer proposing either tumor suppressor or oncogene role for different snoRNAs. In NSCLC, SNORA42 acts as a putative oncogene. Its overexpression enhances cell proliferation and growth in bronchial epithelium and cancer cells, while its knockdown in NSCLC cells inhibits colony forming [7]. In acute promyelocytic leukemia, the SNORD112–114 is specifically activated in a subset of patients and may influence cell growth through a negative regulation of the cell cycle and the Rb pathway [11]. On the contrary, in peripheral T-cell lymphoma, over-expression of the candidate prognostic marker SNORD71 (HBII-239) is associated with favorable outcome [12]. The C/D box snoRNA SNORD50, a translocation partner of BCL6 in B-cell lymphoma [13], is a candidate tumor suppressor significantly associated with clinically relevant prostate [14] and breast [15] cancer. In hepatocellular carcinoma (HCC), SNORD113-1 has been identified as a tumor suppressor [16]. Down-regulation of this snoRNA is associated with decreased survival of HCC patients, while reconstitution of its expression suppresses tumorigenesis *in vitro* and *in vivo*. In glioblastoma, decreased expression of the GAS5 encoded SNORD76 is associated with an aggressive phenotype [17]. Ectopic expression of this tumor suppressor snoRNA inhibits tumorigenicity by arresting cancer cells in S phase *in vitro* and inhibits orthotopic tumor growth *in vivo*. In breast cancer and head and neck squamous cell carcinoma the low expression of another GAS5 encoded snoRNA, SNORD44, correlates with markers of aggressive pathology and poor prognosis [18, 19].

At present, little is known about the pathways of snoRNA turnover. Apparently, snoRNAs are further processed to sdrRNAs in a vast variety of organisms [20]. It is yet unclear whether sdrRNAs are novel functional entities or footprint-products of snoRNA downstream processing shielded from degradation by snoRNA-interacting proteins. A miRNA-like activity has been proposed for sdrRNAs derived from H/ACA-box snoRNAs (H/ACA-sdrRNAs) based on their apparent size of 20-24 nt equivalent to miRNAs, the ability to promote repression of complementary targets *in vitro*, and the association with Dicer and AGO complexes [21-27]. In contrast, a bimodal size distribution of 17-20 nt and 27-30 nt has been reported

for sdrRNAs derived from C/D-box snoRNAs (C/D-sdrRNAs) [3, 22, 23]. C/D-sdrRNAs are not efficiently incorporated in AGO2 suggesting a different function for this type of sdrRNAs [28]. In addition, it has been reported that the highly abundant in brain ‘orphan’ snoRNAs, SNORD115 and SNORD116, are processed into larger sdrRNAs (34-73 nt) that complex with spliceosomal proteins and may regulate the alternative splicing of target mRNAs [29, 30]. Association of C/D-box snoRNAs with novel RNPs and involvement in alternative splicing has been previously observed in mice for the brain specific *MbII-52* [31]. Interestingly, both *MbII-52* and its human ortholog *SNORD115* produce larger sdrRNAs (34-73 nt). Similar observation has also been made for sdrRNA regions of *SNORD88C*, which can influence the alternative splicing of *FGFR3* pre-mRNA [32]. At the same time, studies in *Drosophila sp.* and in human cells show that snoRNAs are strongly enriched in the nuclear fractions of chromatin-associated RNA and possibly involved in the maintenance of open chromatin structure [33].

Here, we report the deep sequencing of patient-derived samples from normal prostate, and PCa in different disease stages, which reveals sdrRNA production from the vast majority of known human snoRNAs. At least 78 of the detected sdrRNAs demonstrate strong differential expression in cancer. Furthermore, the expression of some sdrRNAs and their precursors is associated with clinical progression and metastatic occurrence.

## RESULTS

### Library preparation and sequencing

We generated 10 sncRNA libraries from normal adjacent prostate (NAP), benign prostate hyperplasia (BPH), different stages of PCa, and metastatic lymph node (LN) prepared from fresh-frozen patient material (FF) (Supplementary Table 1). To estimate the influence of sample storage on sncRNA abundance and stability, we prepared a replicate library from formalin-fixed, paraffin-embedded tissue (FFPE) from tumor samples used for one of the fresh-frozen libraries (group 3). All sequencing reactions yielded approximately 14 million raw reads each (13,468,284 to 15,393,670) with the FFPE library producing the highest raw read number (Figure 1a).

### Annotation of the sncRNA transcriptome

The correct mapping of sncRNA reads is challenged by the fact that predominant isoforms of miRNAs and other sncRNAs such as snoRNAs may vary from the mature sequences annotated in public databases. Differences can be caused by alternative 3'-end modifications [34] or alternative 5'-/3'-end positions of

the detected sncRNA. Additionally, the length of mature sncRNA transcripts can be ambiguously annotated in different public databases. To map as many sequence reads as possible, we constructed a custom small non-coding RNA database (sncRNAdb) that consists of 2271 unique small non-coding RNA species corresponding to 2356 unique genomic loci (Supplementary Figure 1 and Supplementary File 1).

Mapping to sncRNAdb resulted in the detection of a total of 1637 unique sncRNAs expressed across any of the 11 libraries with an average of 1229 per library. 70% to 84% of the reads generated from fresh-frozen samples and only 52% of the reads generated from FFPE could be annotated by sncRNAdb (Figure 1a and Supplementary Table 2). The majority of annotated reads mapped to 873 pre-miRNAs (85.5 - 95.6%), 385 tRNAs (1.89 - 7.4%), 228 C/D-box snoRNAs (0.3 - 1.9%), and 91 H/ACA-box snoRNAs (0.0 - 0.1%) (Figure 1b, 1c and Supplementary Tables 2 and 3).

Interestingly, in PCa samples we detected up to

27% more C/D-box and up to 52% more H/ACA-box snoRNAs compared to NAP or BPH. Furthermore, total snoRNA read-counts were increased at least two-fold, indicating possible activation of snoRNA-gene expression in response to malignant transformation. In contrast, the number of detected miRNAs remained relatively stable and the total miRNA read-counts changed by no more than 19% (min. 9,202,300, max. 11,367,682) (Figure 1c, Supplementary Figure 2 and Supplementary Tables 3 and 4).

We also examined the read-length associated with different types of sncRNAs. As expected, miRNA reads had a narrow size distribution between 21 and 23 nt in all libraries. Similar size range was observed for snRNA- and scaRNA-derived RNAs in fresh-frozen libraries. In concordance with our previous results [3], we detected a size peak at 23 nt and a plateau between 26-28 nt for reads mapping to C/D-box snoRNAs. Interestingly, reads mapping to H/ACA snoRNAs and tRNAs demonstrated a shift in size distribution between normal and malignant

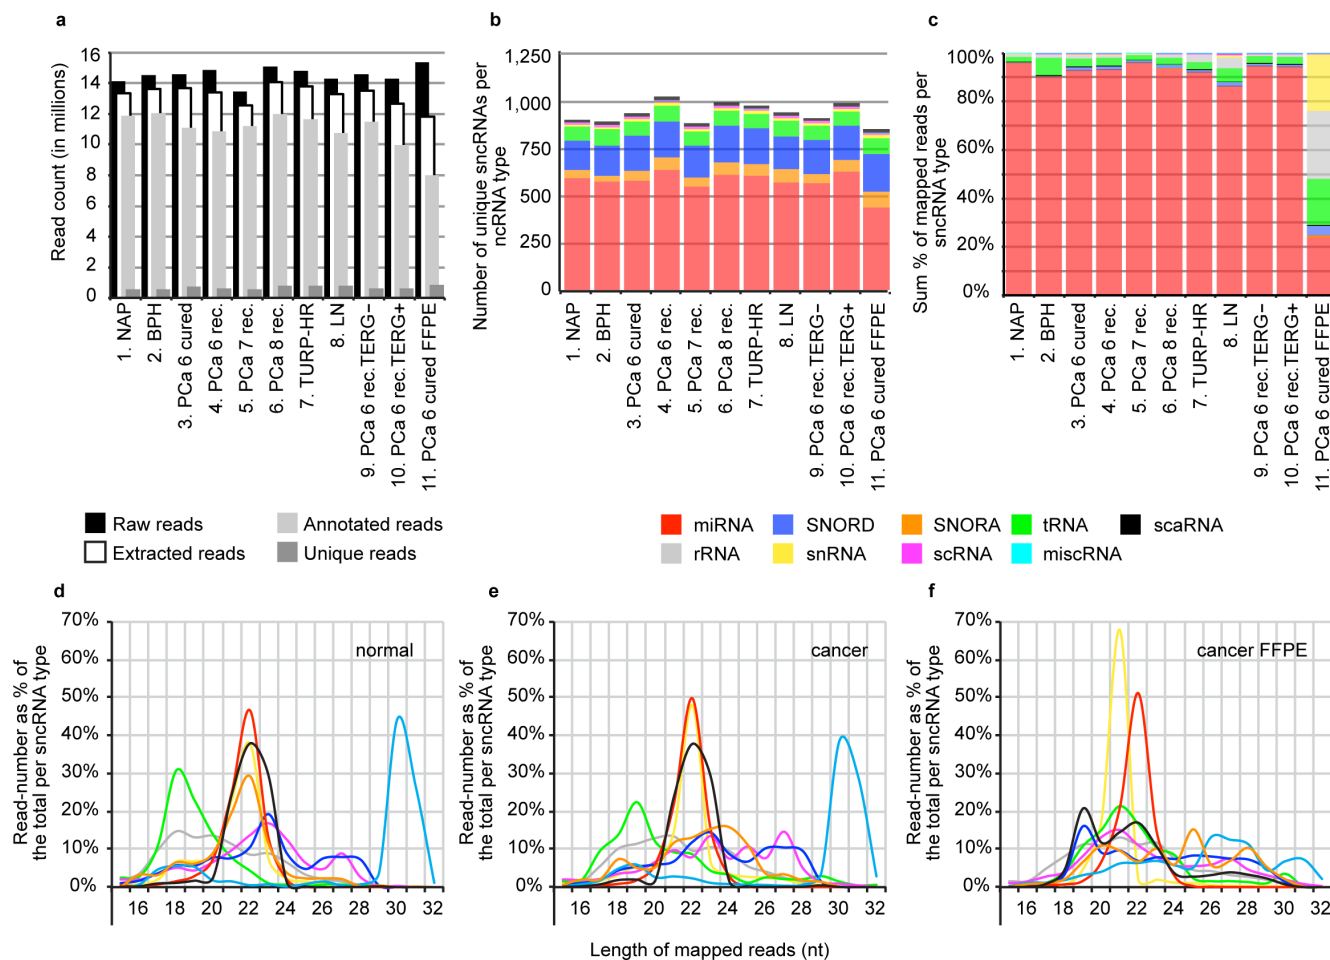

**Figure 1: Summary of sncRNA sequencing data from PCa patient samples.** (a) Number of retrieved raw, extracted, annotated, and unique reads generated for each one of the sequencing libraries. (b) Number of detected sncRNA-species per library. (c) Relative abundance of different sncRNA-types per library. Read-length distribution in normal (d) and cancer libraries (e) derived from fresh-frozen, (f) and FFPE material. Each sncRNA type is represented by different color: miRNA (red), SNORD (dark blue), SNORA (orange), tRNA (green), scaRNA (black), rRNA (gray), snRNA (yellow), scRNA (magenta), other miscellaneous RNAs (light blue).

**Table 1. Number of differentially expressed snedRNAs**

| Comparison                                         | Total number of snedRNAs with significantly changed expression |                              |                                              |      | Type of snRNA |       |       |       |       |
|----------------------------------------------------|----------------------------------------------------------------|------------------------------|----------------------------------------------|------|---------------|-------|-------|-------|-------|
|                                                    | Corrected p-value <sup>1</sup> ( $\leq 0.01$ )                 | Fold change ( $\geq \pm 4$ ) | Expression in cancer (2 <sup>nd</sup> group) |      | tRF           | miRNA | sdRNA |       | Other |
|                                                    |                                                                |                              | Up                                           | Down |               |       | SNORD | SNORA |       |
| NAP vs. PCa 6 cured (gr1 vs. gr 3)                 | 200                                                            | 68                           | Up                                           | 66   | 25            | 9     | 23    | 5     | 4     |
|                                                    |                                                                |                              | Down                                         | 2    | 0             | 2     | 0     | 0     | 0     |
| PCa 6 cured vs. PCa 6 recurrent (gr3 vs. gr4)      | 155                                                            | 14                           | Up                                           | 0    | 0             | 0     | 0     | 0     | 0     |
|                                                    |                                                                |                              | Down                                         | 14   | 10            | 3     | 1     | 0     | 0     |
| PCa 6 recurrent vs. PCa 6 recurrent (gr4 vs. gr10) | 156                                                            | 16                           | Up                                           | 8    | 0             | 4     | 1     | 1     | 2     |
|                                                    |                                                                |                              | Down                                         | 8    | 0             | 5     | 3     | 0     | 0     |
| PCa 6 cured vs. PCa 6 recurrent (gr3 vs. gr10)     | 141                                                            | 18                           | Up                                           | 5    | 0             | 3     | 0     | 1     | 1     |
|                                                    |                                                                |                              | Down                                         | 13   | 3             | 7     | 3     | 0     | 0     |
| NAP vs. PCa 7 recurrent (gr1 vs. gr 5)             | 168                                                            | 34                           | Up                                           | 18   | 2             | 3     | 9     | 3     | 1     |
|                                                    |                                                                |                              | Down                                         | 16   | 5             | 8     | 1     | 0     | 2     |
| NAP vs. PCa 8 recurrent (gr1 vs. gr6)              | 238                                                            | 105                          | Up                                           | 87   | 27            | 15    | 29    | 5     | 11    |
|                                                    |                                                                |                              | Down                                         | 18   | 7             | 8     | 1     | 0     | 2     |
| NAP vs. metastatic LN (gr1 vs. gr 8)               | 302                                                            | 157                          | Up                                           | 115  | 36            | 28    | 35    | 5     | 11    |
|                                                    |                                                                |                              | Down                                         | 42   | 7             | 35    | 0     | 0     | 0     |
| NAP vs. TURP HR (gr1 vs. gr 7)                     | 254                                                            | 104                          | Up                                           | 87   | 24            | 38    | 18    | 1     | 4     |
|                                                    |                                                                |                              | Down                                         | 17   | 3             | 11    | 1     | 0     | 2     |
| BPH vs. TURP HR (gr2 vs. gr7)                      | 352                                                            | 202                          | Up                                           | 92   | 21            | 42    | 21    | 2     | 6     |
|                                                    |                                                                |                              | Down                                         | 110  | 94            | 15    | 0     | 0     | 1     |
| NAP vs. BPH (gr1 vs. gr2)                          | 250                                                            | 107                          | Up                                           | 99   | 93            | 5     | 0     | 0     | 1     |
|                                                    |                                                                |                              | Down                                         | 8    | 0             | 5     | 1     | 0     | 2     |
| FF vs. FFPE (gr3 vs. gr11)                         | 689                                                            | 540                          | Up                                           | 462  | 261           | 6     | 80    | 56    | 59    |
|                                                    |                                                                |                              | Down                                         | 78   | 2             | 73    | 2     | 1     | 0     |

<sup>1</sup>Z-test, Bonferroni corrected p-value

samples (Figure 1d, 1e and Supplementary Figure 3) suggesting cancer-associated alterations in snRNA processing.

Comparison of the snRNA composition of the FFPE library with its fresh-frozen counterpart demonstrated that the relative miRNA read-content in FFPE decreased 3.9-fold from 92% to 24% of the total annotated reads. On the contrary, the number of reads mapping to other snRNA species was strongly elevated *i.e.* sequence read-counts were increased 152-fold for snRNAs, 12.7-fold for H/ACA-box snoRNAs, 5.6-fold for tRNAs, and 2.7-fold for C/D-box snoRNAs ( $\chi^2$  test,  $p < 0.0001$  for all tested groups) (Figure 1c, Supplementary Figure 2 and Supplementary Table 4). The size distribution of read-length in FFPE material was also strongly affected for all examined ncRNA groups except for miRNAs. (Figure 1e,f and Supplementary Figure 3). These observations can be explained with the higher level of RNA degradation in FFPE for transcripts longer than miRNA [35, 36].

### Mapping, and annotation of snRNA-derived RNAs (sncdRNAs)

The majority of miRNA reads in small RNA sequencing data map to the specific location on their pre-miRNA corresponding to the mature miRNA. Similarly, reads mapping to other snRNAs, originate from specific positions on their precursor rather than being randomly derived and can represent specific, biologically functional, smaller RNA species, *e.g.* sdRNAs or tRNA fragments (tRFs) [37]. Nevertheless, the assignment of RNA-seq sequence-reads to specific sdRNAs or tRFs for quantitation purposes is hampered by the lack of proper annotation. Furthermore, many snRNAs produce multiple fragments [29, 30] that may overlap each other, which further complicates the exact determination of their origin loci and a subsequent quantitative analysis.

To correctly determine the boundaries of sdRNAs, tRFs and other snRNA-derived RNAs (sncdRNAs) in our dataset and annotate their specific location on the precursor sequence, we applied the computational algorithm

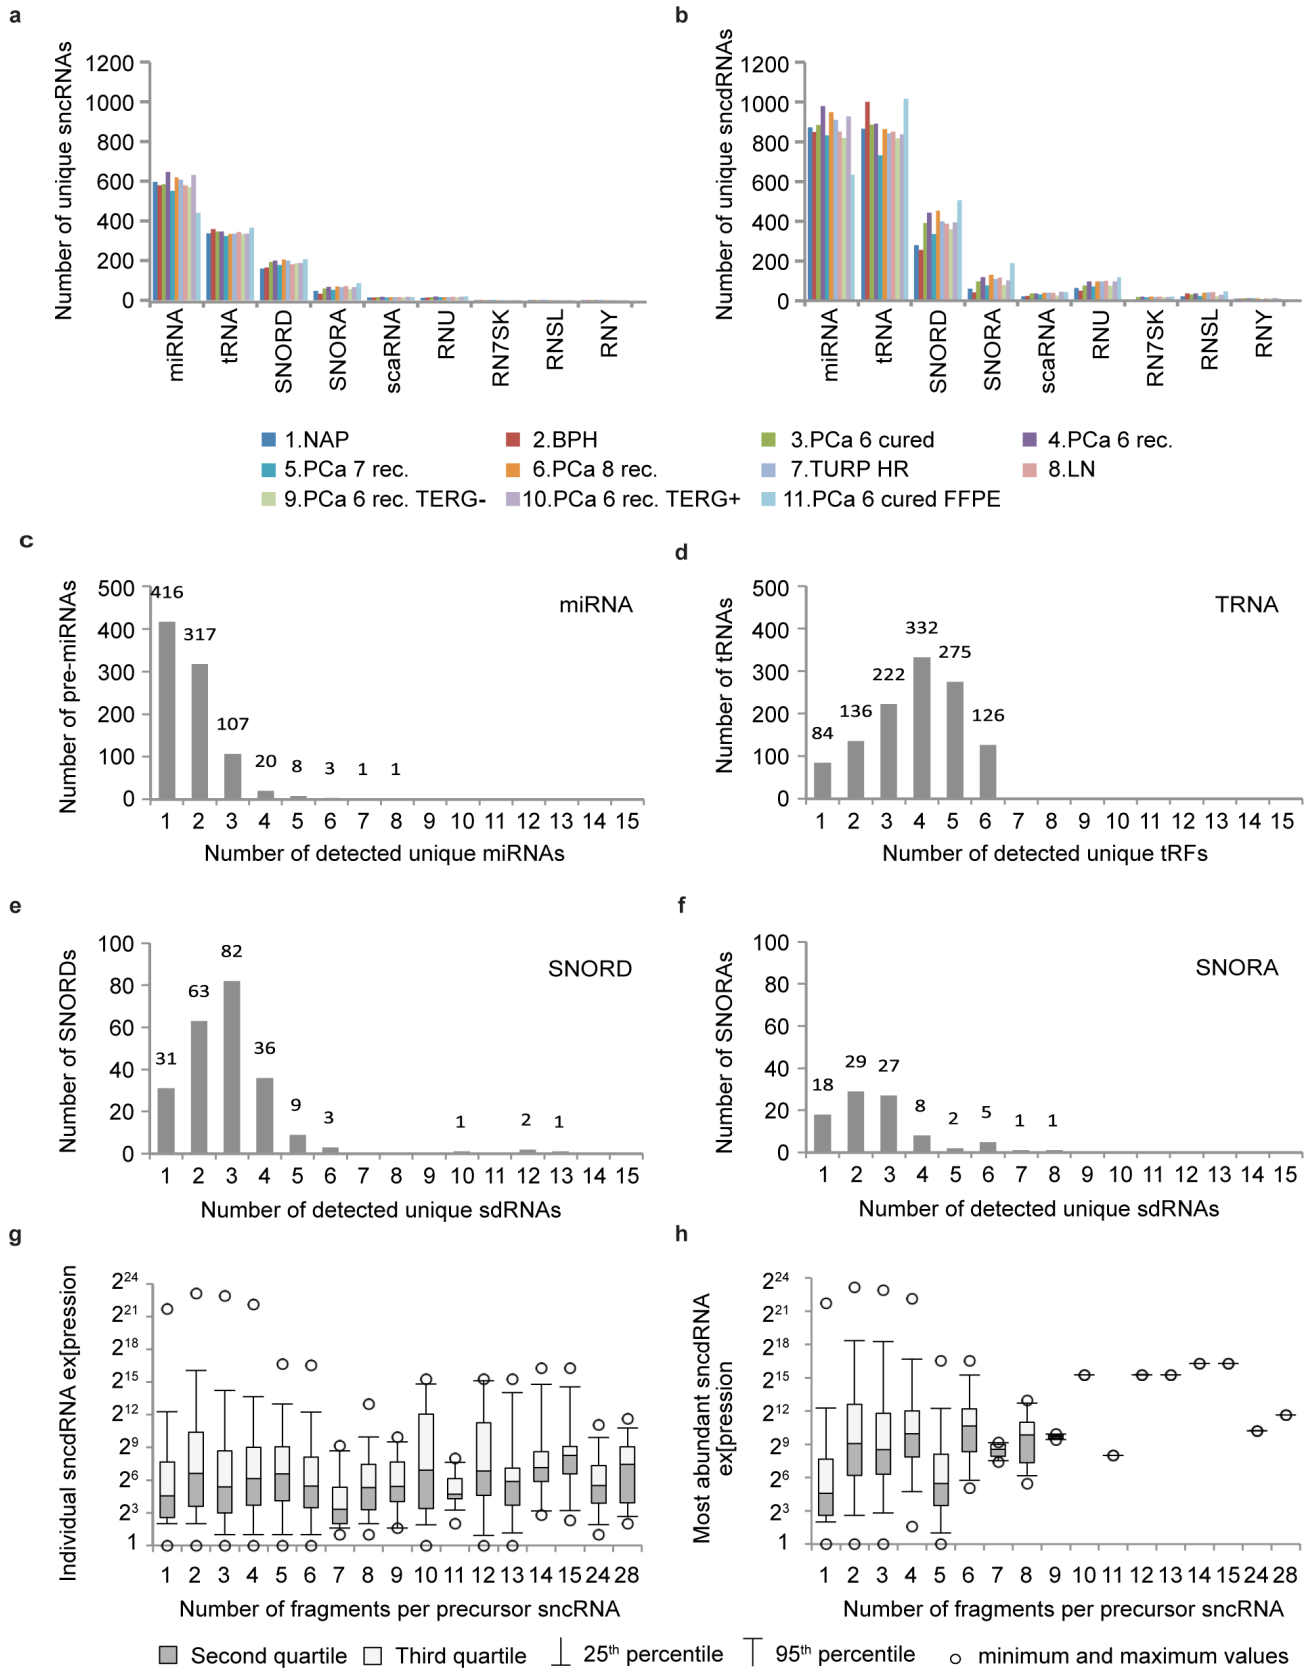

**Figure 2: FlaiMapper results.** (a) Total number of detected sncRNA precursors per RNA type and sequencing library. (b) Total number of sncdRNAs per precursor type and sequencing library. (c, d, e, f) Different types of sncRNAs produce different number of fragments. (g) Relation between the number of fragments produced per precursor RNA and the expression levels of individual fragments. (h) Relation between the number of fragments produced per precursor RNA and the expression levels of the most abundant fragment per precursor.



Fragment Location Annotation and Identification Mapper (FlaiMapper) and evaluated its performance in this data set as described [38]. Shortly, FlaiMapper predicted 5'- and 3'-miRNA ends were compared with the 5'- and 3'-end boundaries of corresponding mature miRNAs in MiRBase, v17 [39]. 82% of the detected miRNAs had a correctly determined 5'-end exactly matching miRBase annotation. An additional 11 % had an offset of 1 nt. In agreement with previous observations [39], 3'-ends of

mature miRNAs had higher variability and matched miRBase annotations for 45%. From the investigated miRNAs additional 33% had 1 nt offset, and 14%, 2 nt offset (Supplementary Figure 4).

Given the high confidence with which FlaiMapper identified 5'- and 3'-end boundaries of *bona fide* miRNAs, we performed annotation of all sncdRNAs in our fresh-frozen libraries. We detected 3927 unique sncdRNAs derived from different precursor classes. From these, 1524

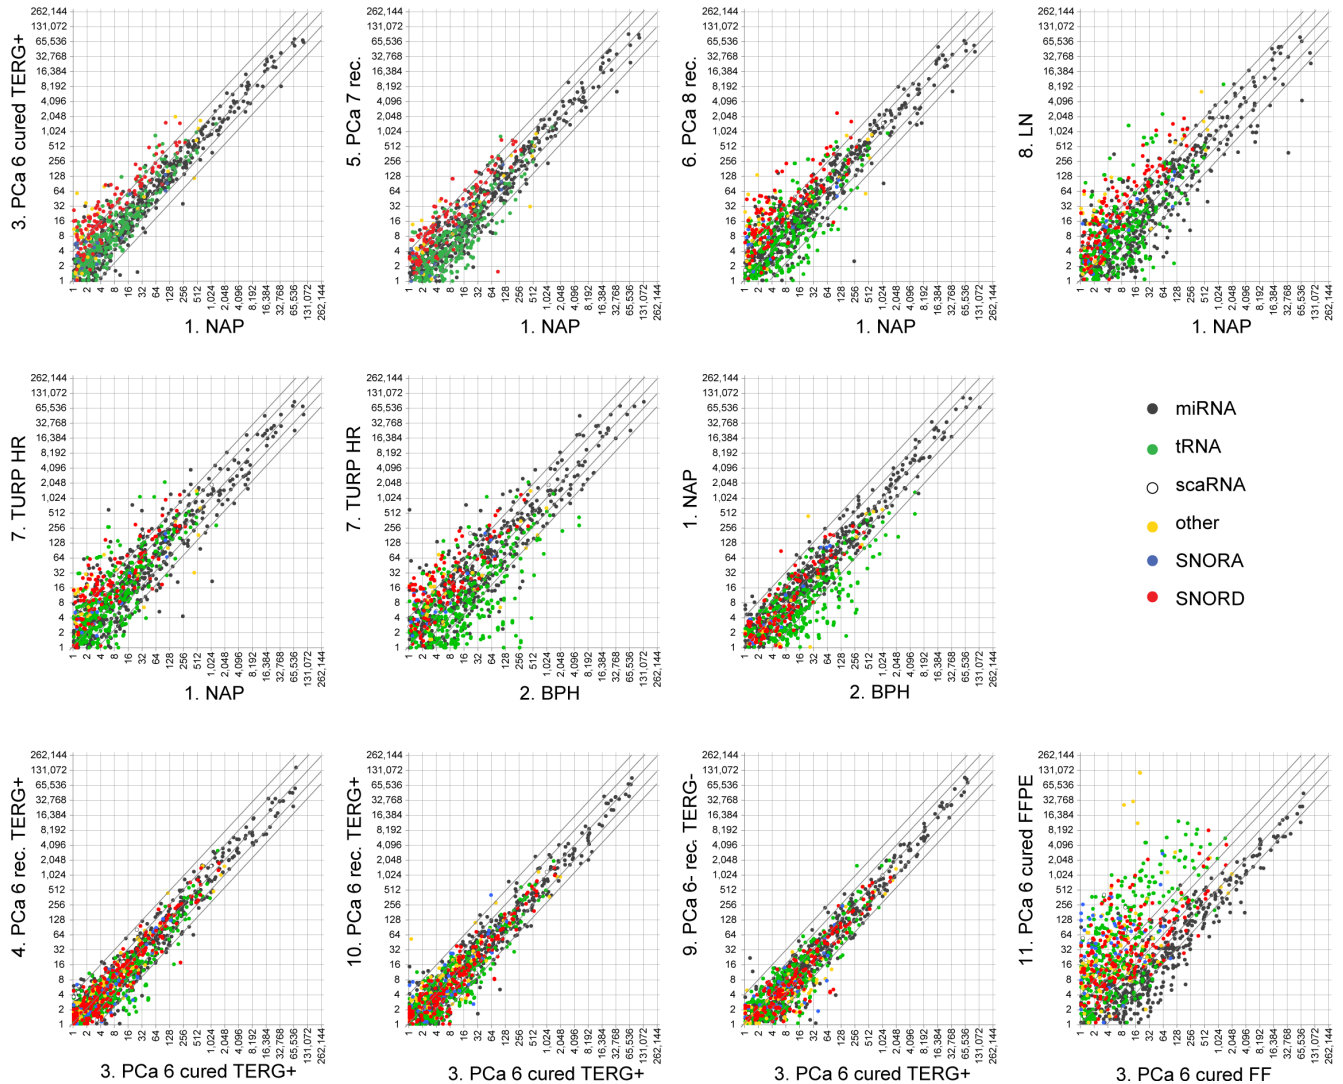

**Figure 3: Global expression changes of sncdRNAs in normal and malignant prostate tissue.** Upper and middle panels present scatterplots comparing the normalized expression values of individual sncdRNA (dots) in each prostate cancer library (PCa) during progressing disease to these in the library prepared from normal adjacent prostate tissue (NAP). The expression of sncdRNAs in the hormone-refractory, transurethral resection of the prostate (TURP HR) library is also compared to the benign prostate hyperplasia (BPH) library since the latest represents the normal counterpart of malignant transurethral resection of the prostate material. Differences in sncdRNA expression between biological replicates of Gleason 6 cancers (PCa 6) as well as comparison of a fresh-frozen library (FF) with its formalin-fixed, paraffin-embedded (FFPE) counterpart derived from the same patients are presented in the lower panels. Each sncdRNA type is presented by a different color. Diagonal lines across each scatterplot represent fold change difference in expression. Middle line, crossing the horizontal and vertical axes at 0, no expression change; lines crossing the vertical and horizontal axes at 2, two-fold expression change; lines crossing the vertical and horizontal axes at 4, four-fold expression change. Cured, no disease relapse after radical prostatectomy; rec., recurrent disease, biochemical or metastatic relapse after surgery; LN, metastatic lymph node sample; TERG+, TMPRSS2-ERG fusion gene event; TERG-, no TMPRSS2-ERG fusion event; Numbers (6, 7 or 8) after PCa indicate the pathological Gleason score of the tumors in the respective group

originated from miRNAs, 1175 - from tRNAs, 657 - from C/D-box snoRNAs, 244 - from H/ACA-box snoRNAs, and 327 - from other sncRNA species (Supplementary Table 5 and Supplementary File 2). The total number of detected unique sncdRNAs was higher than the number of detected unique precursor species showing that individual sncRNA precursors produce more than one sncdRNA (Figure 2a, 2b and Supplementary Figure 5). For example, the majority of pre-miRNAs produced one or two miRNAs corresponding to the guide and passenger strand. For C/D box snoRNAs we detected between 1 and 6 sdrRNAs originating from the same precursor, with the exception of the unusually long *SNORD3A*, *SNORD3B* and *SNORD3C*, which give rise to 10 to 13 C/D-sdrRNAs. Most H/ACA-box snoRNAs produced between 1 and 3 sdrRNAs, while for tRNAs we detected between 1 and 6 tRFs per precursor (Figure 2d-2f). Other examined sncRNAs in our libraries produced a varying number of fragments ranging from 3 for the telomerase RNA component to 28 for the small nuclear 7SK RNA (Figure 2c; Supplementary Figure 6 and 7).

We next argued that the expression level of the sncRNA-precursor might positively influence the number of sncdRNAs detected per sncRNA. We examined the distribution of expression values of individual sncdRNAs in relation to the number of sncdRNAs derived per sncRNA and could not observe a strong dependency between the median expression levels of sncdRNAs and the total number of sncdRNAs produced per sncRNA. We obtained similar results when the expression level of the most abundant sncdRNA per precursor was used as a surrogate measure of the expression of the precursor RNA (Figure 2g, 2h). Based on these results, we can conclude that multiple sncdRNAs originating from the same sncRNA can be detected independently of their (low) expression level or the expression level of their precursor. Vice versa, different precursor RNAs can produce only one sncdRNAs with very high abundance. Hence, it can be assumed that the number and quantity of different sncdRNAs do not directly reflect the abundance of their precursor but, like miRNAs, are probably also influenced by additional aspects of cellular metabolism, e.g. association with protein complexes and/or turnover rates.

The size of unique sdrRNAs ranged between 15 and 29 nt (Supplementary Figure 6). However, when the expression of individual sdrRNAs of the same length were accounted, we observed a predominant size of 23 nt for the majority H/ACA-sdrRNAs and a binominal size distribution for C/D-sdrRNAs with two predominant sizes of 22-23 nt and 28 nt (Supplementary Figure 7), which is in agreement with our previous findings and other reports [3, 22, 23, 40]. C/D-sdrRNAs demonstrated a broader size distribution, which however could be a reflection of the broader size range of their precursors.

## sdrRNAs are differentially expressed in prostate cancer

Previously, we observed differential expression of sdrRNAs between PCa specimens [3]. To examine if such changes are a cancer-specific event we compared the expression of FlaiMapper defined sncdRNAs between normal (NAP and BPH) and malignant tissues of progressing disease (PCa, LN, TURP). We detected between 34 and 202 sncdRNAs with significant differential expression (Table 1, Figure 3, and Supplementary File 3). Approximately one third of the differentially expressed RNAs in each comparison comprised C/D-sdrRNAs upregulated in cancer (Figure 3). In contrast, only one sdrRNA was differentially expressed between non-malignant samples (NAP and BPH) and only five, between biological replicate samples (PCa, Gleason 6, groups 3, 4, and 10). This suggests that the accumulation of C/D-sdrRNAs is primarily driven by malignant transformation.

To examine the effect of sample storage on fragment abundance we compared the expression of sncdRNAs between the FFPE sample and its fresh-frozen (FF) counterpart. We limited comparison analyses to sncRNAs detected in any of the FF libraries. MiRNAs had decreased expression in FFPE compared with sdrRNAs, tRFs and other sncdRNAs (Table 1, Figure 3 and Supplementary Figure 8). Nevertheless, the reduction of miRNA expression in FFPE appears to be the result of a global decrease in miRNA read-counts compared to read-counts of other sncdRNAs (Figure 1c) since the relative expression of miRNAs correlated strongly between both conditions (Pearson  $\rho = 0.9289$ ) (Supplementary Figure 8). This was not observed for sdrRNAs (Pearson  $\rho = 0.6557$  for C/D-sdrRNAs and 0.3895 for H/ACA-sdrRNAs) or other sncdRNAs, which have longer precursors and may be more susceptible to degradation in FFPE material.

## SdrRNAs demonstrate specific global processing patterns in prostate tissue

Given the discrete size and specific expression of sdrRNAs, we examined detected snoRNAs for the presence of a common processing pattern. To be able to compare with miRNAs, we aligned all snoRNA and pre-miRNA sequences and visualized the position and relative abundance of the corresponding sdrRNAs and miRNAs (Figure 4, Supplementary file 4 and 5). The majority of sdrRNAs originated from equivalent locations of their precursors. Often, one predominant sdrRNA was observed per precursor. The position of these predominant sdrRNAs was not dependent on the total number of smaller species detected per precursor sequence, showing a rather uniform fragmentation pattern consistent with the precursor-type. This is in agreement with previously suggested specific snoRNAs processing and accumulation of smaller RNAs

observed in cell lines [28, 32].

In our patient samples, predominant H/ACA-sdRNAs originate from either the 5'-arm of the first H/ACA-snoRNA hairpin (38.5%) or the 3'-arm of the second hairpin including the region of the ACA-box (31%) (Figure 4b). C/D-box snoRNA produce twice as many predominant sdRNAs originating from the 5'-terminus that contain a C-box (60.1%) compared to 3'-terminal sdRNAs that contain a D-box (30.1%) (Figure 4a).

Interestingly, individual C/D-sdRNAs with highly similar sequences demonstrate almost identical fragmentation pattern, which is also dependent on the conservation of snoRNA structural features. For example, snoRNAs from the highly conserved, multiple gene-copy *SNORD116* family (*HBII-85*), which have a degenerated C'-box (UGAGUGA) produce four sdRNAs where the most abundant one maps to the 5'-region covering the C-box. SnoRNAs from the *SNORD115* (*HBII-52*) family with conserved C'/D'-boxes produce three sdRNAs, with the most abundant ones mapping to the middle-region and covering the entire K-loop including the C'/D'-box. In contrast, the larger snoRNAs from the *SNORD3* family, which lack a conserved C-box, produce between 10 and 13 overlapping sdRNAs with the most predominant mapping to the 3'-end.

*SNORD115* and *SNORD116* sdRNAs differ in size and position from the previously reported highly abundant psnoRNAs processed from the orthologous *MBII-52* and *MBII-85* detected by RNase protection assays [29, 30, 41]. This discrepancy could be explained by the implicit methodology differences between snRNA sequencing and RNase protection assays. However, these differences could be also caused by tissue-specific sdRNA accumulation as previously described for sdRNAs originating from *SNORD88C* (*HBII-180C*) [32] or by the dependence of processing mechanisms on the structural conservation of C/D-box snoRNAs. Of note, *SNORD115*, *SNORD116*, or *SNORD88C*-originating sdRNAs were detected at low abundance in our samples.

### **Processing and expression of sdRNAs originating from GAS5 encoded C/D-box snoRNAs is related to the conservation of structural C'/D'-boxes**

We investigated whether the fragmentation pattern of other C/D-box snoRNA is also dependent on structural feature conservation. For this we analyzed the positional origin of a highly abundant sdRNA produced from the 3'-end of *SNORD78* [3] and other sdRNAs from the same locus. *SNORD78* is intronically encoded by the Growth Arrest Specific 5 gene (*GAS5*) together with 9 other C/D-box snoRNAs [42]. All 10 SNORDs are presumably simultaneously transcribed as a *GAS5* precursor-transcript, which undergoes intron removal and posttranscriptional processing. We could detect sdRNAs from all 10 *GAS5*-

encoded snoRNAs. However, only four (*SNORD44*, *SNORD78*, *SNORD74* and *SNORD81*) snoRNAs produced abundant sdRNAs (Figure 5 and Supplementary Figure 9).

Interestingly, *SNORD74* and *SNORD81* produced three abundant sdRNAs with similar, relatively low expression levels that mapped to the 5'-, 3'-, and middle region of the snoRNAs. The 3'- and middle sdRNAs overlapped each other and covered the K-loop and the conserved canonical C'/D'-box (Figure 5). In contrast, *SNORD78* and *SNORD44*, which lack the canonical C'/D'-box, produced predominantly one 28 nt long sdRNA each, mapping to the 3'-arm for *SNORD78* (*sd78-3'*) or the 5'-arm of *SNORD44* (*sd44-5'*). *sd78-3'* and *sd44-5'* were strongly upregulated in samples prepared from malignant tissue compared to normal or benign, while middle- and opposite arm-derived sdRNAs were present only at very low read-counts in all libraries (Supplementary Figure 9a and 10).

### **SNORD78 and *sd78-3'* expression is associated with metastatic PCa**

To validate our sequencing data we tested the expression of *SNORD44*, *SNORD78*, *SNORD74*, *SNORD81*, and their derivate sdRNAs, in an independent patient cohort of 106 fresh-frozen clinical samples by quantitative real-time PCR (Q-PCR). To evaluate whether increased sdRNA expression is a result of a general activation of the *GAS5* locus, we also measured the expression of the spliced *GAS5* transcript (Figure 6 and Supplementary Figure 9b). All tested snoRNAs and sdRNAs were upregulated in organ-confined PCa compared to normal adjacent controls. This was not related to an elevation of the spliced *GAS5* transcript, which did not demonstrate pronounced expression changes between NAP and PCa. Interestingly, overlapping sdRNAs originating from the same snoRNA as well as full-length snoRNAs were simultaneously detectable by Q-PCR suggesting the existence of multiple conformational states of these snoRNAs.

*Sd78-3'*, *SNORD78* and *GAS5* expression was also detectable in different normal basal prostate epithelium cell lines (PNT2C2, RWPE) prostate cancer cell lines (PC346C, LAPC4, VCAP, LNCAP, 22RV1, PC3, and DU145N) as well as in hepatocellular carcinoma (HEP3B) and colon adenocarcinoma (COLO205) cells demonstrating that *SNORD78* processing to *sd78-3'* is not restricted to prostate tissue or cells. Similarly to patient data, the expression levels of *sd78-3'* and *SNORD78* were not correlated to the expression of the *GAS5* host gene (Supplementary Figure 11).

Consistent with our previous results [3] *sd78-3'* was upregulated in the LN library generated in this study, suggesting association of this sdRNA with aggressive disease. Therefore, in the validation cohort we stratified patients with organ-confined disease at the time of radical



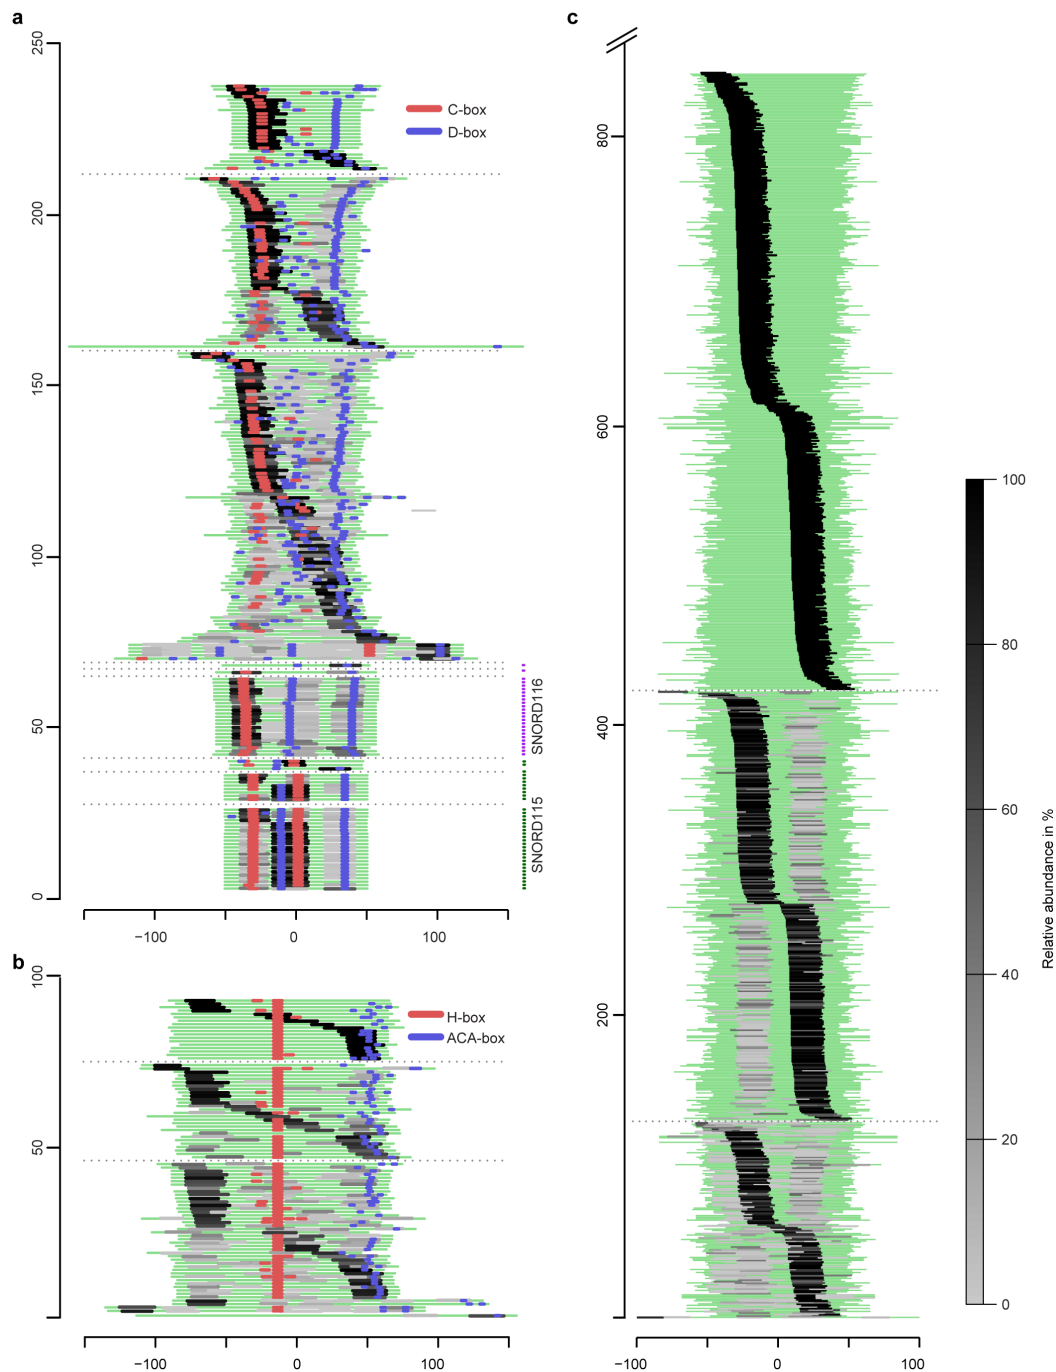

**Figure 4: Global processing patterns and relative abundance of sdrRNAs and miRNAs expressed in prostate (cancer) tissues.** (a) Full-length C/D-box snoRNAs are aligned relative to the middle nucleotide of each sequence. (b) H/ACA-box snoRNAs are aligned based on the position of the H-box. (c) Pre-miRNAs are aligned relative to the middle nucleotide of each sequence. A green line represents each full-length sncRNA. Sequences are extended 10 nt at each end to avoid mapping ambiguity caused by incorrect annotation. Positions of detected conserved H/ACA-boxes or C/D-boxes are shown in blue and red. Light and dark grey lines indicate the positional origin of sdrRNAs, miRNAs and miRNAs\*. The color intensity corresponds to the relative abundance of sncdRNAs originating from the same precursor (read-count as a percentage of the total read-count per precursor), e.g. if only one sdrRNA per snoRNA-precursor is detected it is assigned 100% abundance, if two or more sdrRNAs originate from the same snoRNA the sdrRNA with the highest read-count is given the darkest color and the sdrRNA with the lowest read-count - the lightest. Thin dashed lines separate each panel into three subgroups where sncRNAs producing only one sncdRNA are on top, sncRNAs producing two sncdRNAs are in the middle and those producing three or more sncdRNAs are on the bottom. The highly sequentially conserved, multiple gene-copy C/D-box snoRNAs from the *SNORD116* (*HBII-85*) and *SNORD115* (*HBII-52*) families are grouped together below other C/D-box snoRNAs. The X-axis indicates the position of sncdRNAs relative to the center of their precursor sequence. The Y-axis depicts the number of full-length sncRNA precursors.

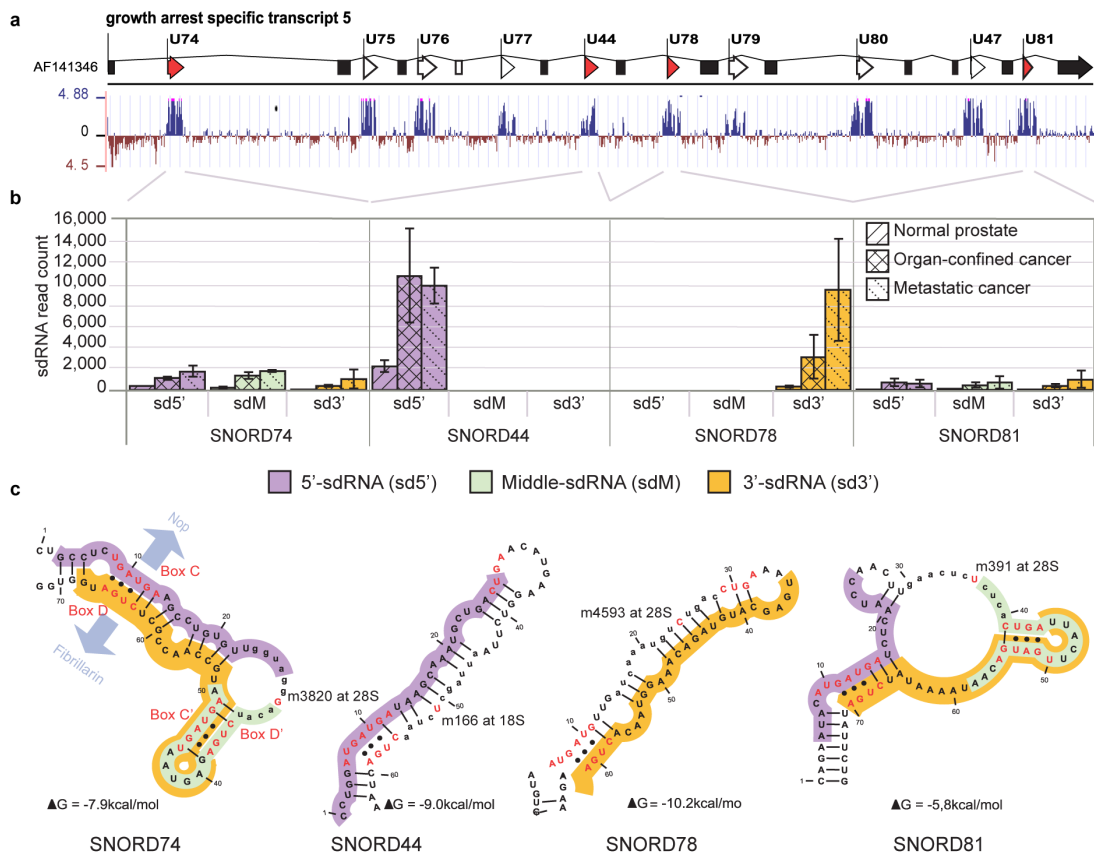

**Figure 5: Genomic organization, conservation, secondary folding, fragmentation pattern and expression of *SNORD44*, *SNORD74*, *SNORD78*, and *SNORD81*.** (a) *SNORD44*, *SNORD74*, *SNORD78*, and *SNORD81* are transcribed simultaneously from the conserved intronic regions of the protein-non-coding *GAS5* gene. Spliced exons (boxes); snoRNA loci (arrows). (b) sdRNAs from *SNORD44*, *SNORD74*, *SNORD78*, and *SNORD81* are up-regulated in PCa. Expression is comparable to PCa-relevant microRNA (not shown). *SNORD74* and *SNORD81* produce equally expressed 5'- (sd5'), middle- (sdM), and 3'-sdRNAs (sd3') with overlapping sdM and sd3'. SdRNAs originating from the middle regions extend towards the antisense box and their 5'-ends map exactly adjacent to the nucleotide complementary to the targeted ribosomal residue. (c) *SNORD44* and *SNORD78* produce predominantly one sdRNA either from the 5'- or the 3'-arm of the snoRNA. The position of core snoRNP-proteins NOP58/56 and FIBRILLARIN (indicated at *SNORD74*) is dependent on the kink-turns formed by non-complementary base-pairing (dots) of the conserved external sequence boxes C and D and/or the internal boxes C'/D'. The rRNA-complementary antisense-box (lower case) is exposed and contains the nucleotide targeted for modification (red), positioned exactly 5 nt upstream of the D or D' box.

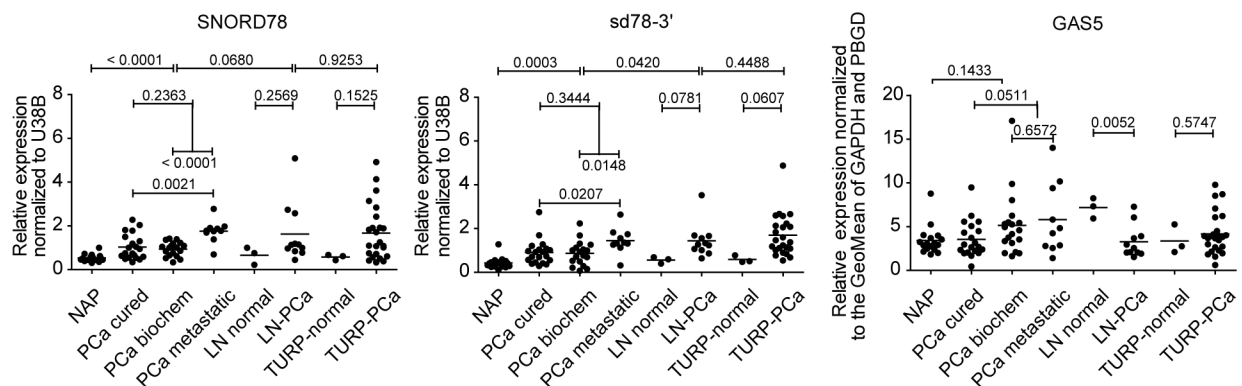

**Figure 6: Q-PCR validation of snoRNA and sdRNA expression in an independent cohort of patient samples.** NAP, normal adjacent prostate (n=17); PCa-cured, radical prostatectomy sample, no disease relapse after radical prostatectomy (n=20); PCa-biochem, radical prostatectomy sample, patients manifested biochemical disease relapse after surgery (n=18); PCa-met, radical prostatectomy sample, metastatic disease progression after surgery (n=10); LN-normal, normal lymph node (n=3); LN-PCa, metastatic lymph node (n=11); TURP-normal, transurethral resection of the prostate sample that does not contain cancer cells (n=3). PCa-TURP, transurethral resection of the prostate sample that contains cancer cells (n=24). Horizontal line marks the mean of each group. Patient number in each group is indicated in brackets. P-values from unpaired two-tailed t-tests (alpha level 0.05) are indicated above each comparison.

prostatectomy into three groups: cured after radical prostatectomy, biochemical disease recurrence, and progression to metastatic disease after surgery. Strikingly, the expression of *sd78-3'* and its precursor *SNORD78* in the third group was significantly higher already at the time of surgery, suggesting an early involvement in PCa progression and possible prognostic marker potential for these sncRNAs.

## DISCUSSION

sncRNAs and in particular miRNAs emerged as novel modulators of gene expression and regulators of fundamental cellular processes often disturbed in cancer. At the same time, long-known “housekeeping” RNAs such as snoRNAs appeared to have tissue-specific expression altered in solid tumors and hematological malignancies [8, 36, 43]. Furthermore, several studies discussed above demonstrate that similarly to miRNA, snoRNAs carry diagnostic and/or prognostic biomarker potential in different cancer types [6-10, 14, 15].

Improved detection and screening over the last decade led to large increase in prostate cancer detection. However, the majority of presently diagnosed patients carry clinically insignificant tumors, which would never progress to a life threatening disease. Without the presence of better prognostic markers, many patients undergo unnecessary invasive surgical treatment.

Prompted by our previous findings on elevated levels of snoRNA fragments in metastatic PCa [3] and by accumulating evidence from sequencing data that demonstrates processing of snoRNA to stable smaller sdrRNAs [22, 32, 37] we combined RNA sequencing of human prostate (cancer) tissue with tailored computational analysis. This resulted in a methodologically quantitated catalog of 3927 sncdRNAs originating from 1637 unique sncRNAs and allowed us to follow for changes in their expression during malignant transformation and cancer progression.

To investigate possible effects of sample storage conditions we compared the sncRNA transcriptome of fresh-frozen tissue with its FFPE-stored counterpart. We saw large changes in the accumulation of sncdRNAs, particularly sdrRNAs and tRFs, when we compared fresh-frozen with FFPE material. This was not the case for miRNAs where we observed only relative down-regulation most possibly caused by the additional buildup of degradation products of mRNAs and long ncRNAs due to sample preparation and storage [35]. In addition, while miRNA read-length in FFPE tissue remained unchanged, reads from other sncRNAs had changed length distribution indicating that FFPE-preserved tissue is less suitable for the analysis of sncRNAs other than miRNA.

Previously we detected differential expression of sdrRNAs between organ-confined PCa and lymph node metastases [3]. The expression analysis presented

here indicates that the major accumulation of sdrRNAs is associated with malignant transformation and can be described by an increased global production and/or accumulation of sdrRNAs already in the early cancer stages but it is not directly associated with the expression levels of precursor snoRNAs. Biological replicate analysis among three libraries (PCa, Gleason score 6) confirms the reproducibility of sequencing experiments on fresh-frozen tissue as less than 20 sncRNAs show significantly changed expression levels. We did not observe a direct association between the number of sncdRNAs arising from one precursor and its quantity suggesting that sncdRNA accumulation is not the direct result of increased sncRNA turnover in malignant cells. Q-PCR analysis confirmed the expression changes detected by sequencing and also identified the simultaneous existence of full-length snoRNAs and their derivative sdrRNAs from the *GAS5* locus. The high levels of *SNORD78* and *sd78-3'* in a subset of patients, which progressed to metastatic disease, identify these two sncRNAs as possible novel prognostic biomarkers for the further stratification of PCa patients at high risk of developing aggressive disease.

It has been shown that the majority of C/D-sdrRNAs are derived from the termini of their precursor and may remain attached to the core snoRNP shielded from further degradation [28]. A large part of the sdrRNAs detected in our libraries is also terminally derived. Nevertheless, the processing patterns of snoRNAs that we observe, and the accumulation of specific sdrRNAs appear to be dependent on the conservation of structural snoRNA features and do not always correspond to snoRNA termini protected by the snoRNP. Furthermore, the overlap and discrete origin-position of multiple sdrRNAs produced from the same precursor exemplified by sdrRNAs produced from *SNORD44*, *SNORD78*, *SNORD74* and *SNORD81* suggest rather specific nucleolytic cleavage that requires different conformational states for C/D-box snoRNAs [44] possibly assisted by structural interaction with the core snoRNPs or yet unidentified proteins. Of note, the highly abundant *sd78-3'* is derived from the opposite part of *SNORD78* and does not overlap with the previously reported snoRNP footprint of *SNORD78* observed by Kishore *et al* [28]. It has been proposed that the specificity of sdrRNA processing patterns detected in human cell lines is conserved between different cell types while the accumulation of individual sdrRNAs is cell type specific implying the existence of dedicated processing mechanisms [22, 23, 32, 45].

It remains to be established how sdrRNAs and other sncdRNAs are produced in the cell and to what extent this process is deregulated in cancer. The miRNA processing RNaseIII, DICER was suggested in the biogenesis of H/ACA-box-originating sdrRNAs that have an apparent size of 20-24 nt. However, C/D box-sdrRNAs identified by us and others [22, 23] have a bimodal size distribution which deviates from that of Dicer products, suggesting the involvement of other nuclease(s) in the generation of

sdRNAs. Another protein from the miRNA biogenesis pathway that could be involved in the generation of SNORD-sdRNAs is AGO2. It has been shown that AGO2 is responsible for the maturation of pre-miRNA-451 which is too short to undergo Dicer processing. The AGO2 cleaved miR-451 product is a fragment of 30 nt that is processed further to the mature 23 nt long miR-451 by unknown exonucleases [46]. Nonetheless, AGO2-derived mature miR-451 is predominantly uridylated at its 3'-end, while most of the C/D box-sdRNAs in our libraries are not. Furthermore, recent analyses of AGO2 PAR-CLIP libraries demonstrate that despite their cellular abundance, C/D box snoRNAs-originating sdRNAs are not efficiently incorporated in AGO2 [28].

The small transcriptome is a mix of turnover products and functional entitles, where a proportion of the cellular sdRNA pool most probably represents stable degradation products shielded by effector proteins. Nevertheless, the mechanisms of sdRNA generation and their putative functional role in normal and malignant cells should be investigated further alongside with their biomarker potential in prostate and other cancers.

## MATERIALS AND METHODS

### Patient samples and cell lines

Snap-frozen, liquid nitrogen stored and FFPE clinical samples (Supplementary Table 1) were from the tissue bank of the Erasmus University Medical Center, Rotterdam, The Netherlands and from Tampere University Hospital (TAUH), Tampere, Finland. Collection and use of patient material was performed according to the national legislations concerning ethical requirements and approved by the Erasmus MC Medical Ethics Committee, Medical Research Involving Human Subjects Act (MEC-2004-261), and the Ethical Committee of the Tampere University Hospital.

Prostate and lymph node tissues were from radical prostatectomy. BPH samples were obtained from cystoprostatectomies and found not to contain any prostate cancer cells. PCa-TURP samples were collected by transurethral resection of the prostate. Histological evaluation of analyzed material was described previously [3].

### RNA isolation

Total RNA from frozen tissue was isolated using RNABee reagent (Campro Scientific, GmbH, Berlin, Germany) according to manufacturer's protocols. Total RNA isolation from FFPE material was described previously [37].

## Sequencing

Total RNA sample pools of four individual patient samples each, were outsourced (BGI, Shenzhen, China) for sequencing. Library preparations were performed according to the "Small RNA Sample Preparation Guide, Part #1004239", (Illumina Inc., <http://www.illumina.com>). Shortly, total RNA pools were separated on 15% Tris/Borate/EDTA urea polyacrylamide electrophoresis gel, and the sncRNA fraction in the size range of 15 to 35 nt was extracted and purified. After 5'- and 3'-adapter ligation, cDNA was generated by reverse transcription with SuperScript II Reverse Transcriptase (Invitrogen, Carlsbad, CA, USA) followed by 15 cycles of PCR by Phusion DNA Polymerase (Finnzymes Oy, Espoo, Finland).

### Small non-coding RNA database (sncRNAdb)

Official small non-coding RNA nomenclature lists and NCBI RefSeq identifier numbers for microRNA precursors (pre-miRNAs), small nucleolar RNAs (snoRNAs), small cytoplasmic RNA (scRNAs), small nuclear RNA (snRNAs), and small miscellaneous RNAs (miscRNAs) were retrieved from the HUGO Gene Nomenclature Committee (HGNC) (<http://www.genenames.org>) [47]. Genome locations corresponding to the RefSeq entries were further extended with 10 nt at the 5'- and 3'-end to ensure correct mapping of reads derived from ambiguously annotated ncRNAs and mapped against the Human Genome Browser – hg19 assembly at the University of California Santa Cruz (UCSC) (<http://genome.ucsc.edu>).[48] UCSC Genome Browser uses miRBase 15; therefore all miRNAs entries were manually curated to match miRBase 17.

Since HGNC does not provide RefSeq identifiers for tRNAs, tRNA data was retrieved from the UCSC dedicated Genomic tRNA Database (<http://gtrnadb.ucsc.edu/>) [49]. The number of mapped reads was positively influenced by the addition of "CCA" triplet to the 3'-end of genomic tRNA sequences and intron removal. Therefore, tRNA entries represent the mature tRNA form and are not extended. Sequences, genomic loci and database identifiers of all ncRNAdb entries are given in Supplementary File 1).

### Computational analysis of sequencing data

Initial mapping of sequencing reads to sncRNAdb was done in CLC-Bio Genomics Workbench (v. 4.9) following the "Small RNA Analysis" workflow. Read-summarizing and adapter-removal parameters from the "Extract and Count" tool were applied: Minimum sampling count was 4; Minimum and maximum number



of nucleotides in reads was 15 and 35 nt, respectively; no 3'- or 5'- terminal nucleotide removal was performed. Each read was screened with "no fixed adapter length" for the (partial) presence of Illumina small RNA adapter: CAAGCAGAAGACGGCATAACGA on the minus strand with alignment mismatches and gaps allowance at a mismatch cost of 3, and a gap cost of 5, minimum score: ns, minimum score end: 3. If adapter was not found reads were discarded from further analysis. Filtered sequence reads were mapped to snRNAdb with a maximum of 2 mismatches allowed using the "Annotate and Merge" tool.

### Location, annotation and quantitation of snRNAs

Annotation of snRNAs was done using FlaiMapper as described [38]. Only sequence reads from libraries derived from fresh-frozen material were used as an input for the calculation of 5'- and 3'-ends of snRNAs. Quantitation and expression analysis of snRNAs was performed in a second round of mapping to FlaiMapper annotated snRNAdb using 'Small RNA Analysis' workflow in CLC-Bio Genomics Workbench (v.4.9). "Expression values" that equal the sum of all reads mapping to a FlaiMapper annotated snRNA were used. Expression data was normalized with the "Reads per Million" algorithm. Differentially expressed snRNAs were detected using Kal's Z-test on proportions [50] with two-sided p-value, followed by Bonferroni correction with a corrected p-value cut-off of 0.01.

### Quantitative real time PCR (qPCR)

snoRNA and sdRNA expression levels were evaluated by qPCR using miRCURY LNA™ Universal RT microRNA PCR, Polyadenylation and cDNA synthesis and SYBR Green kits (Exiqon, Copenhagen, Denmark) and custom LNA™ primers according to the manufacturer's instructions. Custom LNA primers for qPCR analysis of snoRNAs and sdRNAs were designed by Exoqon A/S, Copenhagen, Denmark. Target sequences used for primer design as well as design IDs are listed in Supplementary methods table M1. SNORD38B expression was measured with Reference gene primer set 20391 (Exiqon, Vedbaek, Denmark) and used to normalize raw Ct values by the delta delta Ct Method.

GAS5 expression was assessed by the Promega Reverse Transcription System (Promega Benelux, The Netherlands) and SybrGreen qPCR System (Roche, The Netherlands) according to manufacturer protocols. Primers used were GAS5 FW: CAAGGACTCAGAATTCATGAT and GAS5 REV: AGTGGTCTTTGTAGACTGCC. Raw expression values were normalized against the geometrical mean of GAPDH and PBGD by the delta delta Ct Method.

### Statistical analysis

Significance of snRNA composition and read-numbers were assessed with chi-square test for independence without Yates' correction. Two-sided p-values were calculated at alpha level of 0.05. Differences between groups in qPCR experiments were tested with unpaired two-tailed t-test at alpha level 0.05. Pearson correlation coefficients were assessed at an alpha level of 0.05 using GraphPad Prism 5.

### ACKNOWLEDGMENTS

We thank GJ van Leenders and TH van der Kwast for the pathological examination of patient material.

### FUNDINGS

This work received funding from the European Union Seventh Framework Programme (FP7/2007-2013) under grant agreement No 201438 and NWO-ALW VENI-grant 863.12.014.

### CONFLICTS OF INTERESTS

The authors declare no conflict of interests.

### REFERENCES

1. Iorio MV and Croce CM. MicroRNA dysregulation in cancer: diagnostics, monitoring and therapeutics. A comprehensive review. *EMBO Mol Med.* 2012; 4:143-159.
2. Catto JW, Alcaraz A, Bjartell AS, De Vere White R, Evans CP, Fussel S, Hamdy FC, Kallioniemi O, Mengual L, Schlomm T and Visakorpi T. MicroRNA in prostate, bladder, and kidney cancer: a systematic review. *Eur Urol.* 2011; 59:671-681.
3. Martens-Uzunova ES, Jalava SE, Dits NF, van Leenders GJ, Moller S, Trapman J, Bangma CH, Litman T, Visakorpi T and Jenster G. Diagnostic and prognostic signatures from the small non-coding RNA transcriptome in prostate cancer. *Oncogene.* 2012; 31:978-991.
4. Castle JC, Armour CD, Lower M, Haynor D, Biery M, Bouzek H, Chen R, Jackson S, Johnson JM, Rohl CA and Raymond CK. Digital genome-wide ncRNA expression, including SnoRNAs, across 11 human tissues using polyA-neutral amplification. *PLoS One.* 2010; 5:e11779.
5. Soeno Y, Fujita K, Kudo T, Asagiri M, Kakuta S, Taya Y, Shimazu Y, Sato K, Tanaka-Fujita R, Kubo S, Iwakura Y, Nakamura Y, Mori S, et al. Generation of a Mouse Model with Down-Regulated U50 snoRNA (SNORD50) Expression and Its Organ-Specific Phenotypic Modulation. *PLoS One.* 2013; 8:e72105.
6. Goeze A, Schluns K, Wolf G, Thasler Z, Petersen S and

- Petersen I. Chromosomal imbalances of primary and metastatic lung adenocarcinomas. *J Pathol.* 2002; 196:8-16.
7. Mei YP, Liao JP, Shen J, Yu L, Liu BL, Liu L, Li RY, Ji L, Dorsey SG, Jiang ZR, Katz RL, Wang JY and Jiang F. Small nucleolar RNA 42 acts as an oncogene in lung tumorigenesis. *Oncogene.* 2012; 31:2794-2804.
  8. Liao J, Yu L, Mei Y, Guarnera M, Shen J, Li R, Liu Z and Jiang F. Small nucleolar RNA signatures as biomarkers for non-small-cell lung cancer. *Mol Cancer.* 2010; 9:198.
  9. Ronchetti D, Mosca L, Cutrona G, Tuana G, Gentile M, Fabris S, Agnelli L, Ciceri G, Matis S, Massucco C, Colombo M, Reverberi D, Recchia AG, et al. Small nucleolar RNAs as new biomarkers in chronic lymphocytic leukemia. *BMC Med Genomics.* 2013; 6:27.
  10. Ronchetti D, Todoerti K, Tuana G, Agnelli L, Mosca L, Lionetti M, Fabris S, Colapietro P, Miozzo M, Ferrarini M, Tassone P and Neri A. The expression pattern of small nucleolar and small Cajal body-specific RNAs characterizes distinct molecular subtypes of multiple myeloma. *Blood Cancer Journal.* 2012; 2.
  11. Valleron W, Laprevotte E, Gautier EF, Quelen C, Demur C, Delabesse E, Agirre X, Prosper F, Kiss T and Brousset P. Specific small nucleolar RNA expression profiles in acute leukemia. *Leukemia.* 2012; 26:2052-2060.
  12. Valleron W, Ysebaert L, Berquet L, Fataccioli V, Quelen C, Martin A, Parrens M, Lamant L, de Leval L, Gisselbrecht C, Gaulard P and Brousset P. Small nucleolar RNA expression profiling identifies potential prognostic markers in peripheral T-cell lymphoma. *Blood.* 2012; 120:3997-4005.
  13. Tanaka R, Satoh H, Moriyama M, Satoh K, Morishita Y, Yoshida S, Watanabe T, Nakamura Y and Mori S. Intronic U50 small-nucleolar-RNA (snoRNA) host gene of no protein-coding potential is mapped at the chromosome breakpoint t(3;6)(q27;q15) of human B-cell lymphoma. *Genes Cells.* 2000; 5:277-287.
  14. Dong XY, Rodriguez C, Guo P, Sun X, Talbot JT, Zhou W, Petros J, Li Q, Vessella RL, Kibel AS, Stevens VL, Calle EE and Dong JT. SnoRNA U50 is a candidate tumor-suppressor gene at 6q14.3 with a mutation associated with clinically significant prostate cancer. *Hum Mol Genet.* 2008; 17:1031-1042.
  15. Dong XY, Guo P, Boyd J, Sun X, Li Q, Zhou W and Dong JT. Implication of snoRNA U50 in human breast cancer. *J Genet Genomics.* 2009; 36:447-454.
  16. Xu G, Yang F, Ding CL, Zhao LJ, Ren H, Zhao P, Wang W and Qi ZT. Small nucleolar RNA 113-1 suppresses tumorigenesis in hepatocellular carcinoma. *Mol Cancer.* 2014; 13:216.
  17. Chen LY, Han L, Wei JW, Zhang KL, Shi ZD, Duan R, Li SW, Zhou X, Pu PY, Zhang JN and Kang CS. SNORD76, a box C/D snoRNA, acts as a tumor suppressor in glioblastoma. *Scientific Reports.* 2015; 5.
  18. Gee HE, Buffa FM, Camps C, Ramachandran A, Leek R, Taylor M, Patil M, Sheldon H, Betts G, Homer J, West C, Ragoussis J and Harris AL. The small-nucleolar RNAs commonly used for microRNA normalisation correlate with tumour pathology and prognosis. *Br J Cancer.* 2011; 104:1168-1177.
  19. Mourtada-Maarabouni M, Pickard MR, Hedge VL, Farzaneh F and Williams GT. GAS5, a non-protein-coding RNA, controls apoptosis and is downregulated in breast cancer. *Oncogene.* 2009; 28:195-208.
  20. Martens-Uzunova ES, Olvedy M and Jenster G. Beyond microRNA - Novel RNAs derived from small non-coding RNA and their implication in cancer. *Cancer Lett.* 2013; 340:201-211.
  21. Saraiya AA and Wang CC. snoRNA, a novel precursor of microRNA in *Giardia lamblia*. *PLoS Pathog.* 2008; 4:e1000224.
  22. Taft RJ, Glazov EA, Lassmann T, Hayashizaki Y, Carninci P and Mattick JS. Small RNAs derived from snoRNAs. *RNA.* 2009; 15:1233-1240.
  23. Brameier M, Herwig A, Reinhardt R, Walter L and Gruber J. Human box C/D snoRNAs with miRNA like functions: expanding the range of regulatory RNAs. *Nucleic Acids Res.* 2011; 39:675-686.
  24. Burroughs AM, Ando Y, de Hoon MJ, Tomaru Y, Suzuki H, Hayashizaki Y and Daub CO. Deep-sequencing of human Argonaute-associated small RNAs provides insight into miRNA sorting and reveals Argonaute association with RNA fragments of diverse origin. *RNA Biol.* 2011; 8:158-177.
  25. Ono M, Scott MS, Yamada K, Avolio F, Barton GJ and Lamond AI. Identification of human miRNA precursors that resemble box C/D snoRNAs. *Nucleic Acids Res.* 2011; 39:3879-3891.
  26. Ender C, Krek A, Friedlander MR, Beitzinger M, Weinmann L, Chen W, Pfeffer S, Rajewsky N and Meister G. A human snoRNA with microRNA-like functions. *Mol Cell.* 2008; 32:519-528.
  27. Scott MS, Avolio F, Ono M, Lamond AI and Barton GJ. Human miRNA precursors with box H/ACA snoRNA features. *PLoS Comput Biol.* 2009; 5:e1000507.
  28. Kishore S, Gruber AR, Jedlinski DJ, Syed AP, Jorjani H and Zavolan M. Insights into snoRNA biogenesis and processing from PAR-CLIP of snoRNA core proteins and small RNA sequencing. *Genome Biol.* 2013; 14:R45.
  29. Kishore S, Khanna A, Zhang Z, Hui J, Balwierz PJ, Stefan M, Beach C, Nicholls RD, Zavolan M and Stamm S. The snoRNA MBII-52 (SNORD 115) is processed into smaller RNAs and regulates alternative splicing. *Hum Mol Genet.* 2010; 19:1153-1164.
  30. Shen M, Eyraas E, Wu J, Khanna A, Josiah S, Rederstorff M, Zhang MQ and Stamm S. Direct cloning of double-stranded RNAs from RNase protection analysis reveals processing patterns of C/D box snoRNAs and provides evidence for widespread antisense transcript expression. *Nucleic Acids*

Res. 2011; 39:9720-9730.

31. Soeno Y, Taya Y, Stasyk T, Huber LA, Aoba T and Huttenhofer A. Identification of novel ribonucleo-protein complexes from the brain-specific snoRNA MBII-52. *RNA*. 2010; 16:1293-1300.
32. Scott MS, Ono M, Yamada K, Endo A, Barton GJ and Lamond AI. Human box C/D snoRNA processing conservation across multiple cell types. *Nucleic Acids Res*. 2012; 40:3676-3688.
33. Schubert T, Pusch MC, Diermeier S, Benes V, Kremmer E, Imhof A and Langst G. Df31 protein and snoRNAs maintain accessible higher-order structures of chromatin. *Mol Cell*. 2012; 48:434-444.
34. Koppers-Lalic D, Hackenberg M, Bijnsdorp IV, van Eijndhoven MA, Sadek P, Sie D, Zini N, Middeldorp JM, Ylstra B, de Menezes RX, Wurdinger T, Meijer GA and Pegtel DM. Nontemplated nucleotide additions distinguish the small RNA composition in cells from exosomes. *Cell Rep*. 2014; 8:1649-1658.
35. von Ahlfen S, Missel A, Bendrat K and Schlumpberger M. Determinants of RNA quality from FFPE samples. *PLoS One*. 2007; 2:e1261.
36. Liu A, Tetzlaff MT, Vanbelle P, Elder D, Feldman M, Tobias JW, Sepulveda AR and Xu X. MicroRNA expression profiling outperforms mRNA expression profiling in formalin-fixed paraffin-embedded tissues. *Int J Clin Exp Pathol*. 2009; 2:519-527.
37. Larne O, Martens-Uzunova E, Hagman Z, Edsjo A, Lippolis G, den Berg MS, Bjartell A, Jenster G and Ceder Y. miQ--a novel microRNA based diagnostic and prognostic tool for prostate cancer. *Int J Cancer*. 2013; 132:2867-2875.
38. Hoogstrate Y, Jenster G and Martens-Uzunova ES. FlaiMapper: computational annotation of small ncRNA derived fragments using RNA-seq high throughput data. *Bioinformatics*. 2015; 31:665-673.
39. Kozomara A and Griffiths-Jones S. miRBase: integrating microRNA annotation and deep-sequencing data. *Nucleic Acids Res*. 2011; 39:D152-157.
40. Leung YY, Ryvkin P, Ungar LH, Gregory BD and Wang LS. CoRAL: predicting non-coding RNAs from small RNA-sequencing data. *Nucleic Acids Res*. 2013; 41:e137.
41. Bortolin-Cavaille ML and Cavaille J. The SNORD115 (H/MBII-52) and SNORD116 (H/MBII-85) gene clusters at the imprinted Prader-Willi locus generate canonical box C/D snoRNAs. *Nucleic Acids Res*. 2012; 40:6800-6807.
42. Smith CM and Steitz JA. Classification of gas5 as a multi-small-nucleolar-RNA (snoRNA) host gene and a member of the 5'-terminal oligopyrimidine gene family reveals common features of snoRNA host genes. *Mol Cell Biol*. 1998; 18:6897-6909.
43. Kiss-Laszlo Z, Henry Y and Kiss T. Sequence and structural elements of methylation guide snoRNAs essential for site-specific ribose methylation of pre-rRNA. *EMBO J*. 1998; 17:797-807.
44. Lapinaite A, Simon B, Skjaerven L, Rakwalska-Bange M, Gabel F and Carlomagno T. The structure of the box C/D enzyme reveals regulation of RNA methylation. *Nature*. 2013; 502:519-523.
45. Li Z, Ender C, Meister G, Moore PS, Chang Y and John B. Extensive terminal and asymmetric processing of small RNAs from rRNAs, snoRNAs, snRNAs, and tRNAs. *Nucleic Acids Res*. 2012; 40:6787-6799.
46. Cifuentes D, Xue H, Taylor DW, Patnode H, Mishima Y, Cheloufi S, Ma E, Mane S, Hannon GJ, Lawson ND, Wolfe SA and Giraldez AJ. A novel miRNA processing pathway independent of Dicer requires Argonaute2 catalytic activity. *Science*. 2010; 328:1694-1698.
47. Wright MW and Bruford EA. Naming 'junk': human non-protein coding RNA (ncRNA) gene nomenclature. *Hum Genomics*. 2011; 5:90-98.
48. Kent WJ, Sugnet CW, Furey TS, Roskin KM, Pringle TH, Zahler AM and Haussler D. The human genome browser at UCSC. *Genome Res*. 2002; 12:996-1006.
49. Lowe TM and Eddy SR. tRNAscan-SE: a program for improved detection of transfer RNA genes in genomic sequence. *Nucleic Acids Res*. 1997; 25:955-964.
50. Kal AJ, van Zonneveld AJ, Benes V, van den Berg M, Koerkamp MG, Albermann K, Strack N, Ruijter JM, Richter A, Dujon B, Ansorge W and Tabak HF. Dynamics of gene expression revealed by comparison of serial analysis of gene expression transcript profiles from yeast grown on two different carbon sources. *Mol Biol Cell*. 1999; 10:1859-1872.
