# Supplementary material for: C/D-box snoRNA-derived RNA production is associated with malignant transformation and metastatic progression in prostate cancer
Source: PubMed Central journal article supplement (PMC4627319; doi:10.18632/oncotarget.4172), 2015-05-19

# C/D-box snoRNA-derived RNA production is associated with malignant transformation and metastatic progression in prostate cancer

## Supplementary Material

**Supplementary methods table M1.** Custom LNA primers for the quantitative real time PCR analysis of snoRNAs and sdRNAs were designed by Exiqon A/S, Copenhagen, Denmark using target sequences listed in Supplementary table M1. Forward and reverse primer sequence positions are marked in color. M' refers to sdRNA derived from the middle of the full SNORD sequence.

| ASSAY ID | RNA name               | TARGET SEQUENCE 5' -> 3'                                                         |
|----------|------------------------|----------------------------------------------------------------------------------|
| 443822   | SNORD78<br>Full length | GTGTAATGATGTTGATCAAATGCTGACCTGAAATGAGCATGTAGACAAAGGTAACACTGAAGAA                 |
| 443827   | sd78-3'                | TGAGCATGTAGACAAAGGTAACACTG                                                       |
| 443830   | SNORD44<br>Full length | CCTGGATGATGATAAGCAAATGCTGACTGAACATGAAGGCTTAATTAGCTCTAACTGACTAA                   |
| 443836   | sd44-5'                | CCTGGATGATGATAAGCAAATGCTGACT                                                     |
| 443839   | SNORD74<br>Full length | CTGCCTCTGATGAAGCCTGTGTTGGTAGGGACATCTGAGAGTAATGATGAATGCCAACCGCTCTGATG<br>GTGG     |
| 443845   | sd74-5'                | GCCTCTGATGAAGCCTGTGTTGGTA                                                        |
| 443848   | sd74-M'                | ACATCTGAGAGTAATGATGAA                                                            |
| 443852   | sd74-3'                | AGTAATGATGAATGCCAACCGCTCTGA                                                      |
| 443855   | SNORD81<br>Full length | CAGAATACATGATGATCTCAATCCAACTGAACTCTCTCACTGATTACTTGATGACAATAAAATATCT<br>GATATTCTG |
| 443861   | sd81-5'                | ATACATGATGATCTCAATCC                                                             |
| 443864   | sd81-M'                | CTCACTGATTACTTGATGACAA                                                           |
| 443867   | sd81-3'                | TTACTTGATGACAATAAAATATCTGA                                                       |



**Supplementary table 1. Patient cohort used for the generation of sncRNA libraries<sup>1</sup>.**

| Library                                                    | Gleason score | Genomic alterations (TMPRSS2-ERG; ETV1) | Epithelium % | Cancer % | PCa recurrence after radical prostatectomy | Died |
|------------------------------------------------------------|---------------|-----------------------------------------|--------------|----------|--------------------------------------------|------|
| <b>Group 1. NAP</b>                                        |               |                                         |              |          |                                            |      |
| Patient 1                                                  | n.a.          | n.a.                                    | 70           | 0        | n.a.                                       | n.a. |
| Patient 2                                                  | n.a.          | n.a.                                    | 80           | 0        | n.a.                                       | n.a. |
| Patient 3                                                  | n.a.          | n.a.                                    | 70           | 0        | n.a.                                       | n.a. |
| Patient 4                                                  | n.a.          | n.a.                                    | 70           | 0        | n.a.                                       | n.a. |
| <b>Group 2. BPH</b>                                        |               |                                         |              |          |                                            |      |
| Patient 5                                                  | n.a.          | n.a.                                    | >70%         | 0        | n.a.                                       | n.a. |
| Patient 6                                                  | n.a.          | n.a.                                    | >70%         | 0        | n.a.                                       | n.a. |
| Patient 7                                                  | n.a.          | n.a.                                    | >70%         | 0        | n.a.                                       | n.a. |
| Patient 8                                                  | n.a.          | n.a.                                    | >70%         | 0        | n.a.                                       | n.a. |
| <b>Group 3. PCa 6 cured</b>                                |               |                                         |              |          |                                            |      |
| Patient 9                                                  | 3+3           | TMPRSS2-ERG                             | 90           | 80       | No                                         | No   |
| Patient 10                                                 | 3+3           | TMPRSS2-ERG                             | 80           | 75       | No                                         | No   |
| Patient 11                                                 | 3+3           | TMPRSS2-ERG                             | 80           | 90       | No                                         | No   |
| Patient 12                                                 | 3+3           | TMPRSS2-ERG                             | 80           | 70       | No                                         | No   |
| <b>Group 4. PCa 6 recurrent</b>                            |               |                                         |              |          |                                            |      |
| Patient 13                                                 | 3+3           | TMPRSS2-ERG                             | 80           | 90       | M                                          | Yes  |
| Patient 14                                                 | 3+3           | TMPRSS2-ERG                             | 80           | 90       | PSA progression                            | -    |
| Patient 15                                                 | 3+3           | TMPRSS2-ERG                             | 70           | 80       | PSA progression                            | -    |
| Patient 16                                                 | 3+3           | TMPRSS2-ERG                             | 80           | 85       | PSA progression                            | -    |
| <b>Group 5. PCa 7 recurrent</b>                            |               |                                         |              |          |                                            |      |
| Patient 17                                                 | 4+3           | TMPRSS2-ERG                             | 80           | 90       | M                                          | Yes  |
| Patient 18                                                 | 4+3           | ETV1 fusion                             | 90           | 100      | M                                          | Yes  |
| Patient 19                                                 | 4+3           | TMPRSS2-ERG                             | 70           | 100      | PSA progression                            |      |
| Patient 20                                                 | 4+3           | no                                      | 70           | 80       | PSA progression                            |      |
| <b>Group 6. PCa 8 recurrent</b>                            |               |                                         |              |          |                                            |      |
| Patient 21                                                 | 4+4           | ETV1 overexpression                     | 80           | 100      | M                                          | Yes  |
| Patient 22                                                 | 4+4           | TMPRSS2-ERG                             | 90           | 90       | M                                          | Yes  |
| Patient 23                                                 | 4+5           | no                                      | 70           | 100      | M                                          | Yes  |
| <b>Group 7. PCa TURP hormone refractory disease</b>        |               |                                         |              |          |                                            |      |
| Patient 24                                                 | 5+4           | no                                      | 90           | 100      |                                            | HR   |
| Patient 25                                                 | 3+4           | TMPRSS2-ERG                             | 70           | 90       | M                                          | Yes  |
| Patient 26                                                 | 3+5           | no                                      | 95           | 100      |                                            | HR   |
| Patient 27                                                 | 5+3           | ETV1 fusion                             | 95           | 100      |                                            | HR   |
| <b>Group 8. LN-PCa</b>                                     |               |                                         |              |          |                                            |      |
| Patient 28                                                 | 4+4           | TMPRSS2-ERG                             | n.a.         | 100      | N                                          | Yes  |
| Patient 29                                                 | 4+5           | TMPRSS2-ERG                             | n.a.         | 100      | N                                          | Yes  |
| Patient 30                                                 | 4+4           | TMPRSS2-ERG                             | n.a.         | 100      | N                                          | Yes  |
| Patient 31                                                 | 4+4           | ETV1 fusion                             | n.a.         | 100      | N                                          | yes  |
| <b>Group 9. PCa 6 recurrent no chromosomal alterations</b> |               |                                         |              |          |                                            |      |
| Patient 32                                                 | 3+3           | no                                      | 80           | 90       | M                                          | No   |
| Patient 33                                                 | 3+3           | no                                      | 80           | 90       | M                                          | Yes  |
| Patient 34                                                 | 3+3           | no                                      | 70           | 70       | M                                          | No   |
| Patient 35                                                 | 3+3           | no                                      | 90           | 80       | PSA progression                            | Yes  |
| <b>Group 10. PCa 6 TMPRSS2-ERG fusion</b>                  |               |                                         |              |          |                                            |      |
| Patient 36                                                 | 3+3           | TMPRSS2-ERG                             | 90           | 80       | M                                          | Yes  |
| Patient 37                                                 | 3+3           | TMPRSS2-ERG                             | 90           | 90       | PSA progression                            | No   |
| Patient 38                                                 | 3+3           | TMPRSS2-ERG                             | 70           | 80       | No                                         | Yes  |
| Patient 39                                                 | 3+3           | TMPRSS2-ERG                             | 80           | 90       | No                                         | No   |
| <b>Group 11. FFPE</b>                                      |               |                                         |              |          |                                            |      |
| Patient 9                                                  | 3+3           | TMPRSS2-ERG                             | 90           | 80       | No                                         | No   |
| Patient 10                                                 | 3+3           | TMPRSS2-ERG                             | 80           | 75       | No                                         | No   |
| Patient 11                                                 | 3+3           | TMPRSS2-ERG                             | 80           | 90       | No                                         | No   |
| Patient 12                                                 | 3+3           | TMPRSS2-ERG                             | 80           | 70       | No                                         | No   |

<sup>1</sup> NAP, normal adjacent prostate sample; BPH, benign prostate hyperplasia sample; PCa, radical prostatectomy sample; cured, no disease relapse after radical prostatectomy; recurrent, biochemical or metastatic disease relapse after surgery; LN-PCa, metastatic lymph node sample; PCa-TURP, transurethral resection of the prostate sample; TMPRSS2-ERG, fusion gene event; FFPE, formalin-fixed, paraffin-embedded sample (replicate of group3) n.a., not applicable; M, metastatic occurrence; HR, hormone refractory disease.

**Supplementary table 2**

|                              | Group 1<br>NAP       | Group 2<br>BPH       | Group 3<br>PCa 6<br>cured | Group 4<br>PCa 6<br>recurrent | Group 5<br>PCa 7<br>recurrent | Group 6<br>PCa 8<br>recurrent | Group 7<br>PCa TURP  | Group 8<br>LN met    | Group 9<br>PCa 6<br>TERG- | Group 10<br>PCa 6<br>TERG+ | Group 11<br>FFPE     |
|------------------------------|----------------------|----------------------|---------------------------|-------------------------------|-------------------------------|-------------------------------|----------------------|----------------------|---------------------------|----------------------------|----------------------|
| Total read number            | 14,162,933           | 14,516,262           | 14,598,363                | 14,876,075                    | 13,468,284                    | 15,114,031                    | 14,827,046           | 14,298,445           | 14,597,918                | 14,309,106                 | 15,393,670           |
| Removed reads                | 811,765              | 868,054              | 885,824                   | 1,488,564                     | 909,675                       | 1,041,211                     | 1,034,018            | 999,260              | 1,091,428                 | 1,658,413                  | 3,545,478            |
| Extracted reads              | 13,351,168<br>(94 %) | 13,648,208<br>(94 %) | 13,712,539<br>(94 %)      | 13,387,511<br>(90 %)          | 12,558,609<br>(93 %)          | 14,072,820<br>(93 %)          | 13,793,028<br>(93 %) | 13,299,185<br>(93 %) | 13,506,490<br>(93 %)      | 12,650,693<br>(88 %)       | 11,848,192<br>(77 %) |
| Annotated reads              | 11,888,480<br>(84 %) | 12,044,365<br>(83 %) | 11,082,648<br>(76 %)      | 10,859,490<br>(73 %)          | 11,213,771<br>(83 %)          | 11,994,227<br>(79 %)          | 11,650,557<br>(79 %) | 10,758,631<br>(75 %) | 11,496,537<br>(79 %)      | 9,971,092<br>(70 %)        | 8,010,752<br>(52 %)  |
| Unique reads                 | 551,939              | 584,853              | 729,486                   | 598,249                       | 548,038                       | 788,488                       | 762,000              | 778,904              | 595,716                   | 631,370                    | 822,911              |
| Annotated ncRNA from ncRNAdb | 902                  | 890                  | 936                       | 1023                          | 881                           | 994                           | 977                  | 940                  | 911                       | 990                        | 851                  |

**Supplementary table 3. Number of small ncRNA-species detected in each library**

| Count of precursors per RNA type | Total Count ncRNA type | Group 1<br>NAP | Group 2<br>BPH | Group 3<br>PCa 6<br>cured | Group 4<br>PCa 6<br>recurrent | Group 5<br>PCa 7<br>recurrent | Group 6<br>PCa 8<br>recurrent | Group 7<br>PCa<br>TURP | Group 8<br>LN met | Group 9<br>PCa 6<br>TERG- | Group 10<br>PCa 6<br>TERG+ | Group 11<br>FFPE | Average Count ncRNA type |
|----------------------------------|------------------------|----------------|----------------|---------------------------|-------------------------------|-------------------------------|-------------------------------|------------------------|-------------------|---------------------------|----------------------------|------------------|--------------------------|
| MIR                              | <b>873</b>             | 597            | 580            | 585                       | 648                           | 551                           | 620                           | 607                    | 580               | 569                       | 632                        | 441              | <b>597</b>               |
| RN7SK                            | <b>1</b>               | 1              | 1              | 1                         | 1                             | 1                             | 1                             | 1                      | 1                 | 1                         | 1                          | 1                | <b>1</b>                 |
| RN7SL                            | <b>2</b>               | 2              | 2              | 2                         | 2                             | 2                             | 2                             | 2                      | 2                 | 2                         | 2                          | 2                | <b>2</b>                 |
| RNU                              | <b>23</b>              | 13             | 15             | 16                        | 19                            | 16                            | 17                            | 17                     | 18                | 15                        | 18                         | 19               | <b>16</b>                |
| RNY                              | <b>4</b>               | 3              | 3              | 3                         | 3                             | 3                             | 3                             | 3                      | 3                 | 3                         | 3                          | 3                | <b>3</b>                 |
| RPPHI                            | <b>1</b>               | 1              | 1              | 1                         | 1                             | 1                             | 1                             | 1                      | 1                 | 1                         | 1                          | 1                | <b>1</b>                 |
| SCARNA                           | <b>19</b>              | 14             | 15             | 17                        | 18                            | 15                            | 17                            | 17                     | 17                | 15                        | 18                         | 17               | <b>16</b>                |
| SNAR                             | <b>4</b>               | 0              | 0              | 2                         | 1                             | 0                             | 3                             | 1                      | 3                 | 2                         | 1                          | 0                | <b>1</b>                 |
| SNORA                            | <b>91</b>              | 48             | 34             | 59                        | 69                            | 53                            | 70                            | 67                     | 71                | 56                        | 67                         | 86               | <b>59</b>                |
| SNORD                            | <b>228</b>             | 161            | 166            | 193                       | 201                           | 178                           | 205                           | 200                    | 181               | 187                       | 189                        | 208              | <b>186</b>               |
| TERC                             | <b>1</b>               | 1              | 1              | 1                         | 1                             | 1                             | 1                             | 1                      | 1                 | 1                         | 1                          | 1                | <b>1</b>                 |
| TRNA                             | <b>385</b>             | 337            | 358            | 346                       | 347                           | 324                           | 334                           | 336                    | 345               | 334                       | 336                        | 366              | <b>340</b>               |
| VTRNA                            | <b>5</b>               | 5              | 5              | 5                         | 5                             | 5                             | 5                             | 5                      | 5                 | 5                         | 5                          | 5                | <b>5</b>                 |
| <b>Grand Total</b>               | <b>1637</b>            | <b>1183</b>    | <b>1181</b>    | <b>1231</b>               | <b>1316</b>                   | <b>1150</b>                   | <b>1279</b>                   | <b>1258</b>            | <b>1228</b>       | <b>1191</b>               | <b>1274</b>                | <b>1150</b>      | <b>1229</b>              |

**Supplementary table 4. Total number unique mapped reads per type of small ncRNA precursor and sample library**

| ncRNA            | Group 1<br>NAP        | Group 2<br>BPH        | Group 3<br>PCa 6<br>cured | Group 4<br>PCa 6<br>recurrent | Group 5<br>PCa 7<br>recurrent | Group 6<br>PCa 8<br>recurrent | Group 7<br>PCa TURP   | Group 8<br>LN met    | Group 9<br>PCa 6<br>TERG- | Group 10<br>PCa 6<br>TERG+ | Group 11<br>FFPE      |
|------------------|-----------------------|-----------------------|---------------------------|-------------------------------|-------------------------------|-------------------------------|-----------------------|----------------------|---------------------------|----------------------------|-----------------------|
| <i>pre-miRNA</i> | 11,367,682<br>(95.6%) | 10,777,063<br>(89.5%) | 10,174,066<br>(91.8%)     | 10,023,933<br>(92.3%)         | 10,722,355<br>(95.6%)         | 11,110,642<br>(92.6%)         | 10,547,062<br>(90.5%) | 9,202,300<br>(85.5%) | 10,839,999<br>(94.3%)     | 9,278,102<br>(93.1%)       | 1,907,837<br>(23.8%)  |
| <i>tRNA</i>      | 229,457<br>(1.93%)    | 894,493<br>(7.43%)    | 374,392<br>(3.38%)        | 352,770<br>(3.25%)            | 212,392<br>(1.89%)            | 346,797<br>(2.89%)            | 337,292<br>(2.90%)    | 602,838<br>(5.60%)   | 332,218<br>(2.89%)        | 292,345<br>(2.93%)         | 1,519,993<br>(18.97%) |
| <i>Mt-tRNA</i>   | 40,160<br>(0.34%)     | 99,840<br>(0.83%)     | 104,961<br>(0.95%)        | 75,886<br>(0.70%)             | 49,921<br>(0.45%)             | 108,902<br>(0.91%)            | 197,520<br>(1.70%)    | 63,653<br>(0.59%)    | 37,734<br>(0.33%)         | 97,275<br>(0.98%)          | 63,852<br>(0.80%)     |
| <i>rRNA</i>      | 148,179<br>(1.25%)    | 171,301<br>(1.42%)    | 172,188<br>(1.55%)        | 138,057<br>(1.27%)            | 66,525<br>(0.59%)             | 152,725<br>(1.27%)            | 365,820<br>(3.14%)    | 437,935<br>(4.07%)   | 102,076<br>(0.89%)        | 93,744<br>(0.94%)          | 2,240,371<br>(27.97%) |
| <i>SNORA</i>     | 2,127<br>(0.02%)      | 2,219<br>(0.02%)      | 7,522<br>(0.07%)          | 6,955<br>(0.06%)              | 4,814<br>(0.04%)              | 12,603<br>(0.11%)             | 5,440<br>(0.05%)      | 7,566<br>(0.07%)     | 4,088<br>(0.04%)          | 10,236<br>(0.10%)          | 68,971<br>(0.86%)     |
| <i>SNORD</i>     | 43,005<br>(0.36%)     | 41,957<br>(0.35%)     | 158,927<br>(1.43%)        | 169,165<br>(1.56%)            | 103,279<br>(0.92%)            | 171,873<br>(1.43%)            | 117,390<br>(1.01%)    | 199,045<br>(1.85%)   | 121,528<br>(1.06%)        | 123,460<br>(1.24%)         | 308,121<br>(3.85%)    |
| <i>scaRNA</i>    | 13,624<br>(0.11%)     | 14,208<br>(0.12%)     | 12,622<br>(0.11%)         | 18,053<br>(0.17%)             | 14,469<br>(0.13%)             | 19,856<br>(0.17%)             | 25,066<br>(0.22%)     | 22,528<br>(0.21%)    | 12,890<br>(0.11%)         | 12,698<br>(0.13%)          | 10,720<br>(0.13%)     |
| <i>scRNA</i>     | 26,293<br>(0.22%)     | 37,140<br>(0.31%)     | 53,364<br>(0.48%)         | 46,948<br>(0.43%)             | 30,222<br>(0.27%)             | 42,837<br>(0.36%)             | 37,215<br>(0.32%)     | 59,128<br>(0.55%)    | 33,493<br>(0.29%)         | 38,107<br>(0.38%)          | 37,952<br>(0.47%)     |
| <i>snRNA</i>     | 15,849<br>(0.13%)     | 4,953<br>(0.04%)      | 16,729<br>(0.15%)         | 21,181<br>(0.20%)             | 7,945<br>(0.07%)              | 23,844<br>(0.20%)             | 14,887<br>(0.13%)     | 151,045<br>(1.40%)   | 7,876<br>(0.07%)          | 19,115<br>(0.19%)          | 1,839,129<br>(22.96%) |
| <i>miscRNA</i>   | 2,080<br>(0.02%)      | 1,172<br>(0.01%)      | 7,854<br>(0.07%)          | 6,505<br>(0.06%)              | 1,833<br>(0.02%)              | 4,076<br>(0.03%)              | 2,840<br>(0.02%)      | 12,542<br>(0.12%)    | 4,577<br>(0.04%)          | 5,489<br>(0.06%)           | 13,605<br>(0.17%)     |
| <i>TERC</i>      | 24<br>(0.00%)         | 19<br>(0.00%)         | 23<br>(0.00%)             | 37<br>(0.00%)                 | 16<br>(0.00%)                 | 72<br>(0.00%)                 | 25<br>(0.00%)         | 51<br>(0.00%)        | 58<br>(0.00%)             | 521<br>(0.01%)             | 201<br>(0.00%)        |
| <b>Total</b>     | <b>11,888,480</b>     | <b>12,044,365</b>     | <b>11,082,648</b>         | <b>10,859,490</b>             | <b>11,213,771</b>             | <b>11,994,227</b>             | <b>11,650,557</b>     | <b>10,758,631</b>    | <b>11,496,537</b>         | <b>9,971,092</b>           | <b>8,010,752</b>      |

**Supplementary table 5. Number of detected sncdRNAs (e.g. sdRNAs, tRFs and other fragments) per type of RNA precursor**

| Type of precursor small ncRNA | Total Count unique smaller RNAs | Group 1<br>NAP | Group 2<br>BPH | Group 3<br>PCa 6<br>cured | Group 4<br>PCa 6<br>recurrent | Group 5<br>PCa 7<br>recurrent | Group 6<br>PCa 8<br>recurrent | Group 7<br>PCa TURP | Group 8<br>LN met | Group 9<br>PCa 6<br>TERG- | Group 10<br>PCa 6<br>TERG+ | Group 11<br>FFPE | Average Count unique smaller RNAs |
|-------------------------------|---------------------------------|----------------|----------------|---------------------------|-------------------------------|-------------------------------|-------------------------------|---------------------|-------------------|---------------------------|----------------------------|------------------|-----------------------------------|
| MIR                           | 1524                            | 872            | 850            | 885                       | 980                           | 832                           | 948                           | 911                 | 852               | 818                       | 928                        | 634              | 865                               |
| TRNA                          | 1175                            | 866            | 1000           | 886                       | 891                           | 732                           | 863                           | 843                 | 852               | 816                       | 837                        | 1017             | 873                               |
| SNORD                         | 657                             | 280            | 255            | 391                       | 443                           | 336                           | 453                           | 400                 | 387               | 359                       | 394                        | 506              | 382                               |
| SNORA                         | 244                             | 61             | 41             | 97                        | 119                           | 77                            | 131                           | 109                 | 116               | 79                        | 103                        | 189              | 102                               |
| SCARNA                        | 74                              | 23             | 25             | 36                        | 36                            | 32                            | 40                            | 40                  | 40                | 26                        | 46                         | 43               | 35                                |
| RNU                           | 129                             | 64             | 50             | 76                        | 98                            | 71                            | 97                            | 97                  | 100               | 74                        | 98                         | 119              | 86                                |
| RN7SK                         | 27                              | 3              | 6              | 19                        | 21                            | 17                            | 21                            | 19                  | 21                | 17                        | 19                         | 21               | 17                                |
| RN7SL                         | 48                              | 22             | 37             | 32                        | 36                            | 25                            | 40                            | 42                  | 43                | 23                        | 29                         | 47               | 34                                |
| RNY                           | 15                              | 10             | 10             | 12                        | 12                            | 12                            | 12                            | 9                   | 12                | 10                        | 14                         | 11               | 11                                |
| RPPHI                         | 11                              | 7              | 3              | 1                         | 7                             | 2                             | 7                             | 9                   | 11                | 4                         | 5                          | 9                | 6                                 |
| SNAR                          | 4                               | 0              | 0              | 2                         | 1                             | 0                             | 3                             | 1                   | 3                 | 2                         | 1                          |                  | 1                                 |
| TERC                          | 3                               | 2              | 1              | 1                         | 2                             | 1                             | 2                             | 1                   | 1                 | 1                         | 2                          | 2                | 1                                 |
| VTRNA                         | 16                              | 9              | 8              | 9                         | 9                             | 7                             | 13                            | 10                  | 8                 | 8                         | 9                          | 9                | 9                                 |
| <b>Grand Total</b>            | <b>3927</b>                     | <b>2219</b>    | <b>2286</b>    | <b>2447</b>               | <b>2655</b>                   | <b>2144</b>                   | <b>2630</b>                   | <b>2491</b>         | <b>2446</b>       | <b>2237</b>               | <b>2485</b>                | <b>2607</b>      | <b>2423</b>                       |



**Supplementary figure 1. Composition of ncRNAdd**

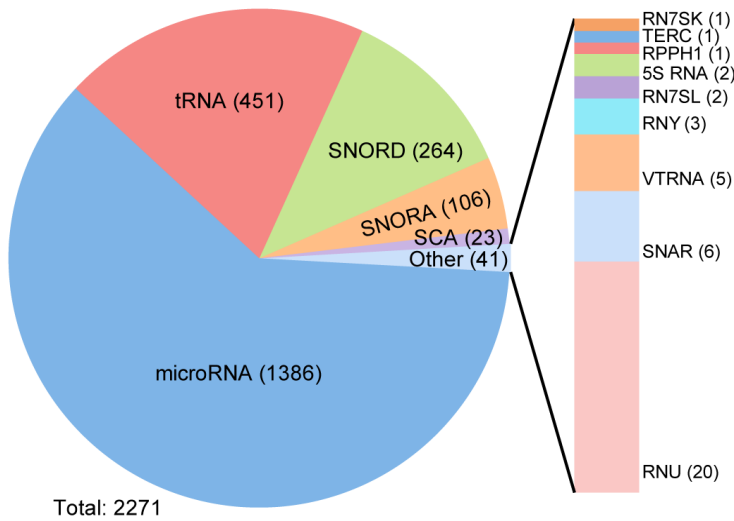

**Supplementary figure 2. Total number of mapped reads per small ncRNA precursor**

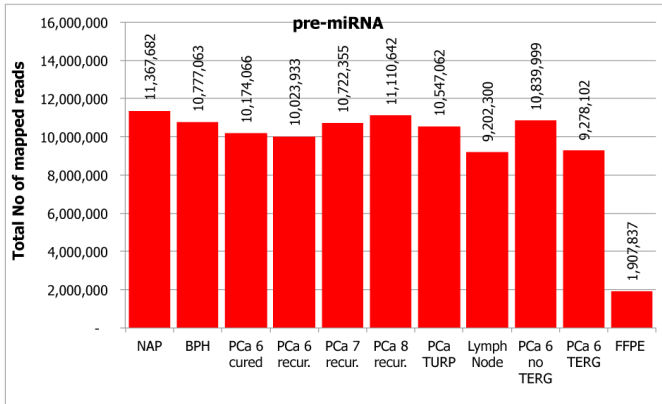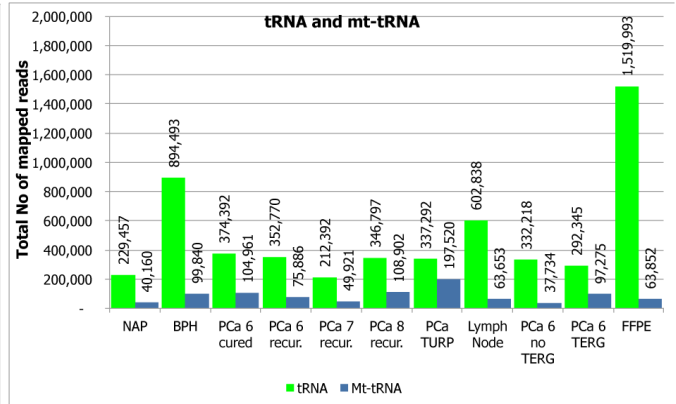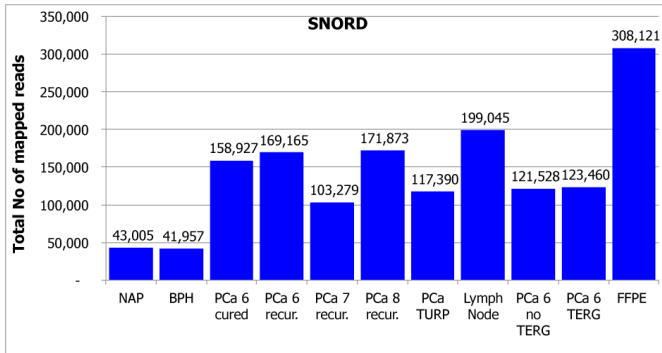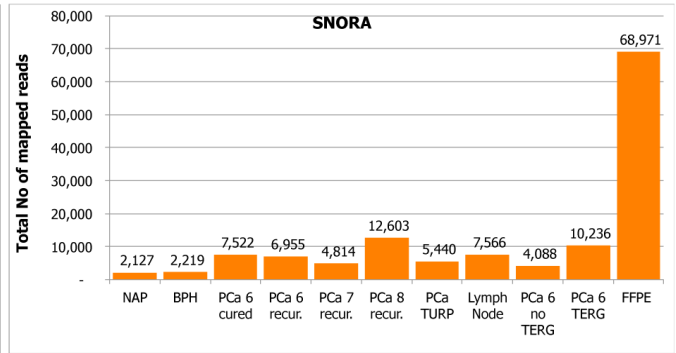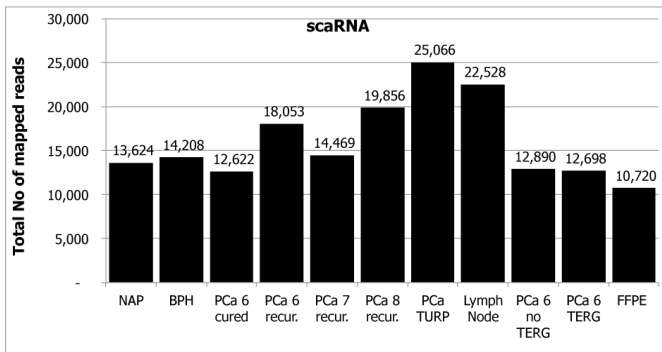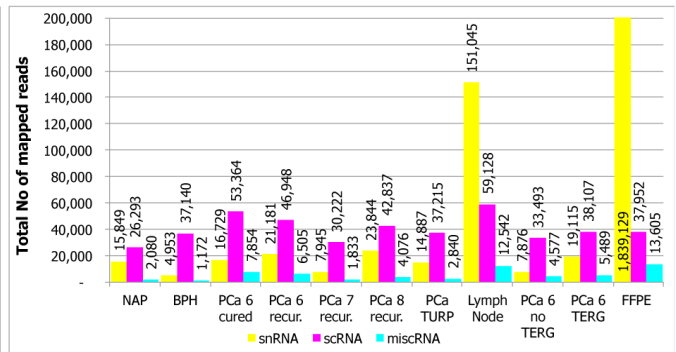

**Supplementary figure 3. Size distribution of sequence reads mapping to small ncRNA in normal and malignant fresh-frozen and FFPE preserved material.**

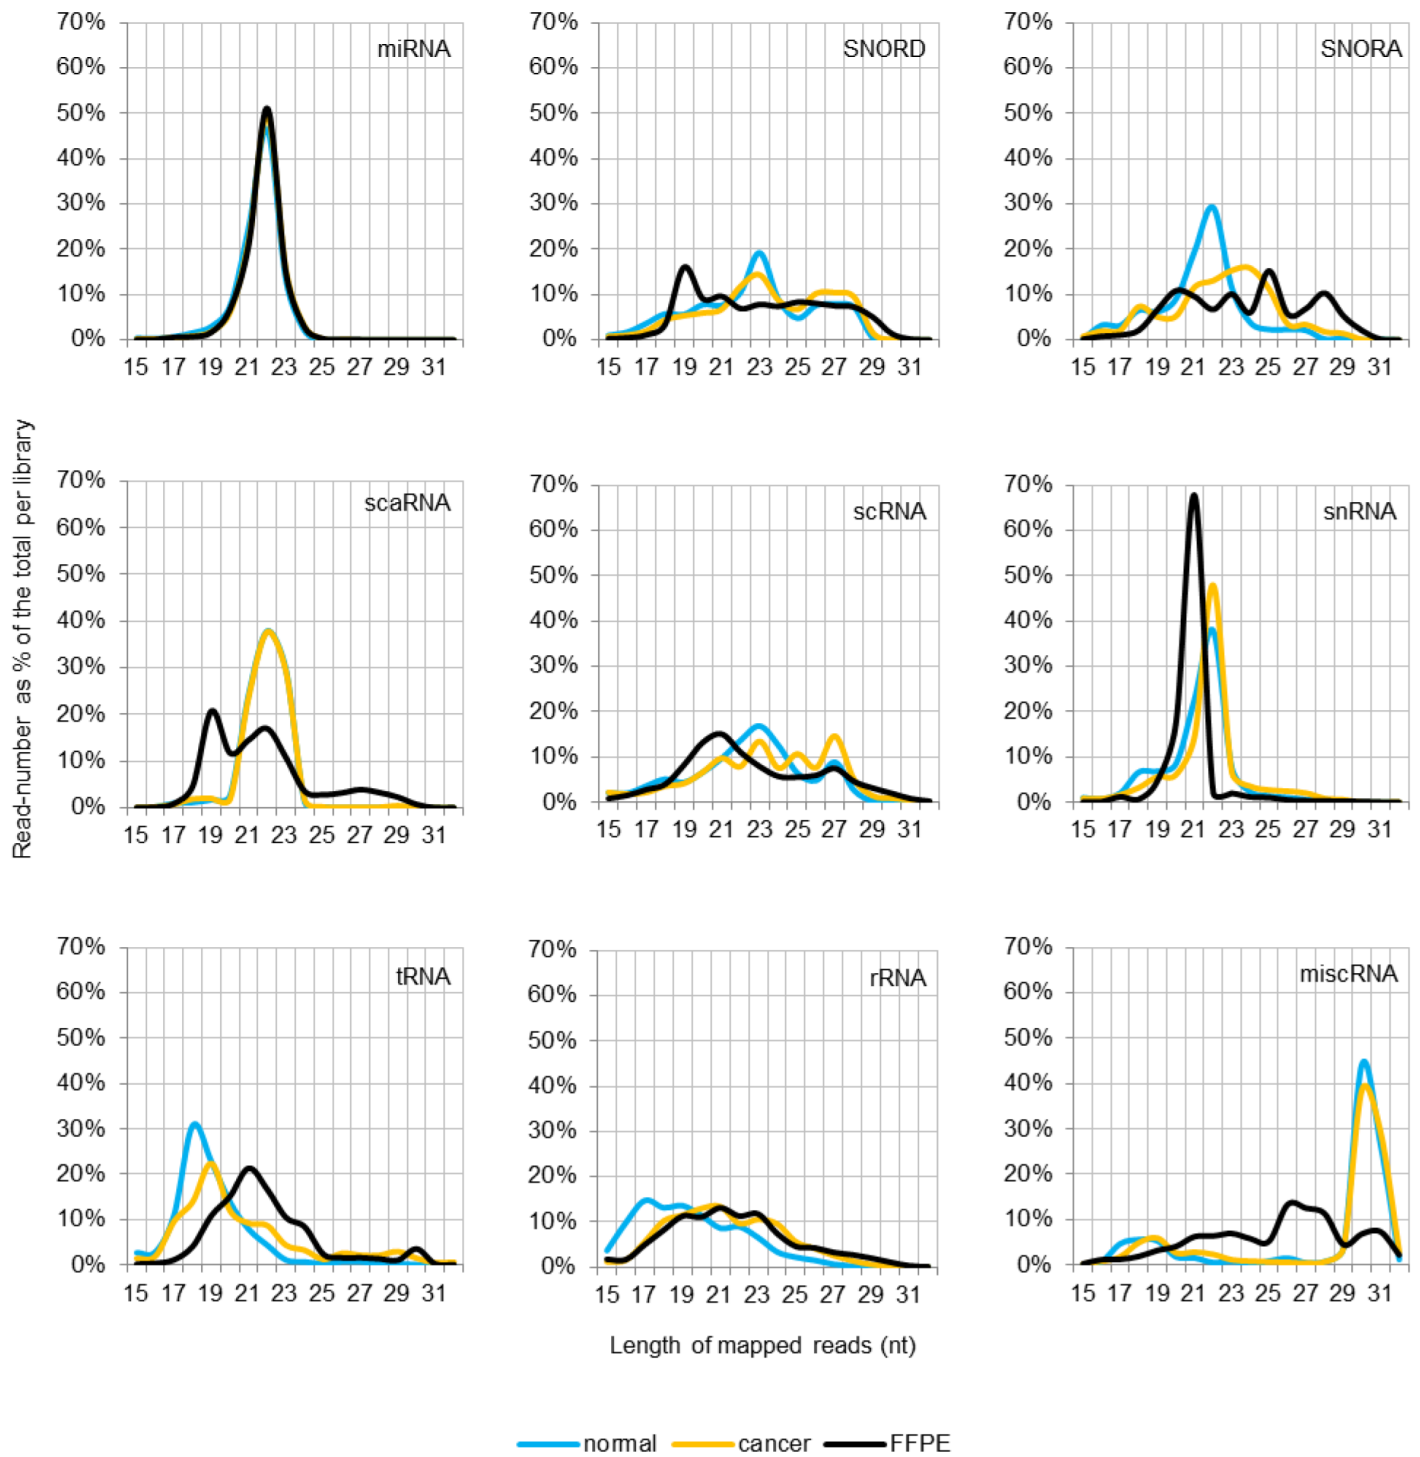



**Supplementary figure 4. Validation of FlaiMapper performance.** FlaiMapper predicted 5'- and 3'-ends of 707 miRNAs originating from the 592 detected in fresh frozen samples pre-miRNAs were compared with the 5'- and 3'-end boundaries of corresponding mature miRNAs in MiRBase, v.17 (ref. <sup>1</sup>).

The vertical axis gives the percentage of 5'-, or 3'-ends mapping to the corresponding miRBase-annotated miRNA sequence end. Exact matches are plotted at position 0 (horizontal axis). The percentages of miRNAs for which FlaiMapper detected longer or shorter ends are plotted according to the number of additional nucleotides at positions 1 to 5 and -1 to -5, respectively.

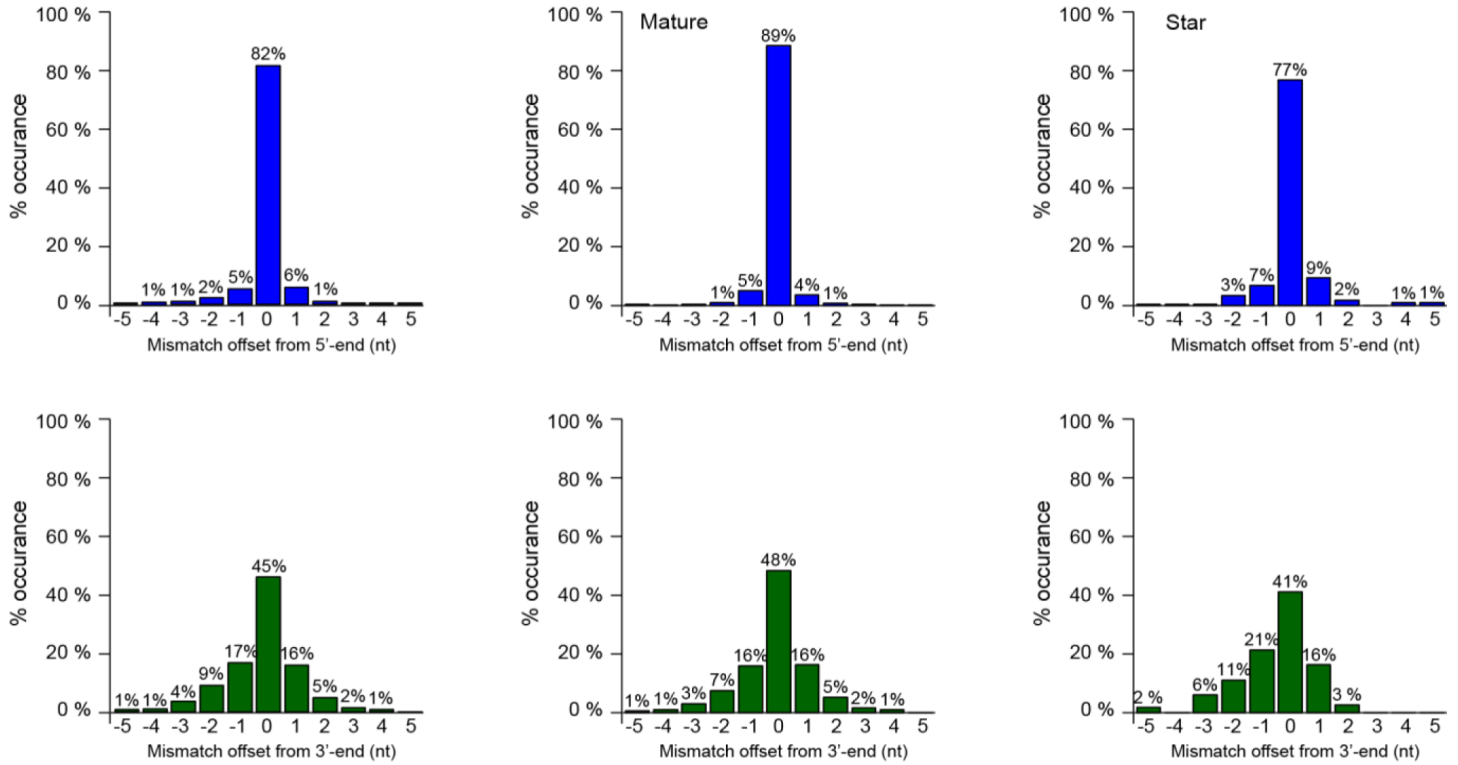

- 1 Kozomara A, Griffiths-Jones S. miRBase: integrating microRNA annotation and deep-sequencing data. *Nucleic Acids Res* 2011; **39**: D152-157.



**Supplementary figure 6. Length-distribution of unique sncdRNAs determined by FlaiMapper in each sequencing library.** The summed number of unique sncdRNAs with a distinct length originating from a specific type of small ncRNA is plotted on the Y-axis as a percentage of the total number of unique sncdRNAs originating from that type of small ncRNA in each sequenced library.

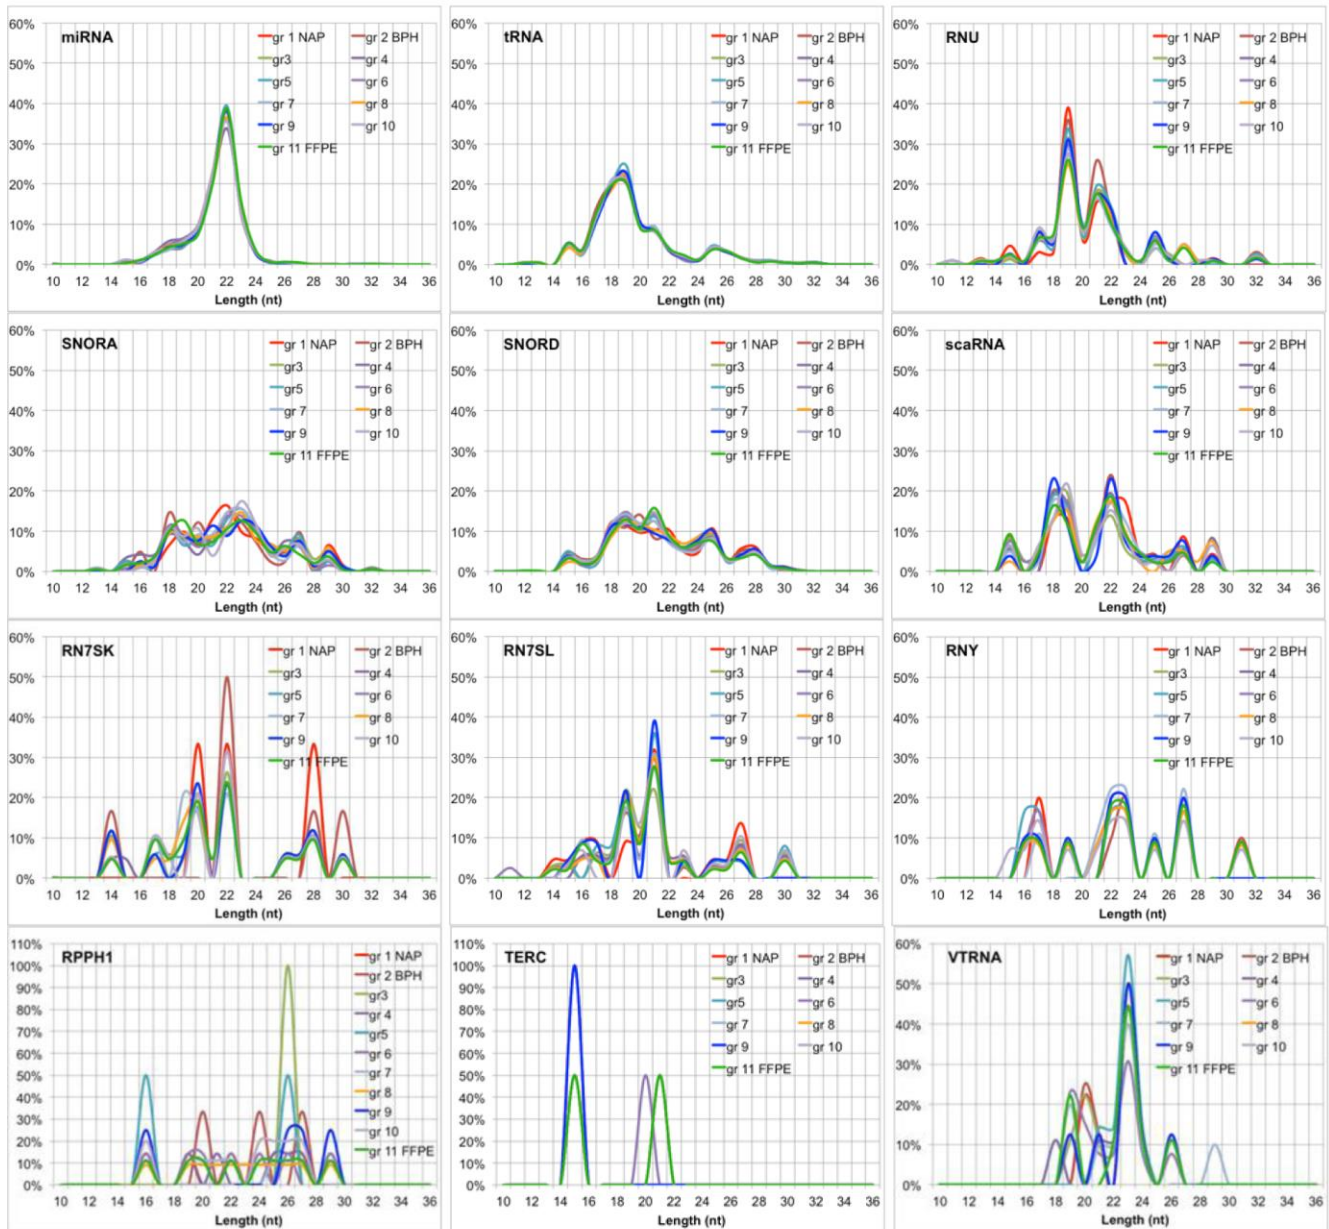

Summed number of sncdRNAs originating from each precursor corresponding to 100%

|             | MIR | TRNA | SNORD | SNORA | SCARNA | RNU | RN7SK | RNSL | RNY | RPPH1 | SNAR | TERC | VTRNA | Total per group |
|-------------|-----|------|-------|-------|--------|-----|-------|------|-----|-------|------|------|-------|-----------------|
| <b>gr1</b>  | 872 | 866  | 280   | 61    | 23     | 64  | 3     | 22   | 10  | 7     | 0    | 2    | 9     | <b>2219</b>     |
| <b>gr2</b>  | 850 | 1000 | 255   | 41    | 25     | 50  | 6     | 37   | 10  | 3     | 0    | 1    | 8     | <b>2286</b>     |
| <b>gr3</b>  | 885 | 886  | 391   | 97    | 36     | 76  | 19    | 32   | 12  | 1     | 2    | 1    | 9     | <b>2447</b>     |
| <b>gr4</b>  | 980 | 891  | 443   | 119   | 36     | 98  | 21    | 36   | 12  | 7     | 1    | 2    | 9     | <b>2655</b>     |
| <b>gr5</b>  | 832 | 732  | 336   | 77    | 32     | 71  | 17    | 25   | 12  | 2     | 0    | 1    | 7     | <b>2144</b>     |
| <b>gr6</b>  | 948 | 863  | 453   | 131   | 40     | 97  | 21    | 40   | 12  | 7     | 3    | 2    | 13    | <b>2630</b>     |
| <b>gr7</b>  | 911 | 843  | 400   | 109   | 40     | 97  | 19    | 42   | 9   | 9     | 1    | 1    | 10    | <b>2491</b>     |
| <b>gr8</b>  | 852 | 852  | 387   | 116   | 40     | 100 | 21    | 43   | 12  | 11    | 3    | 1    | 8     | <b>2446</b>     |
| <b>gr9</b>  | 818 | 816  | 359   | 79    | 26     | 74  | 17    | 23   | 10  | 4     | 2    | 1    | 8     | <b>2237</b>     |
| <b>gr10</b> | 928 | 837  | 394   | 103   | 46     | 98  | 19    | 29   | 14  | 5     | 1    | 2    | 9     | <b>2485</b>     |
| <b>gr11</b> | 634 | 1017 | 506   | 189   | 43     | 119 | 21    | 47   | 11  | 9     |      | 2    | 9     | <b>2607</b>     |





**Supplementary figure 7. Relative abundance of sncdRNAs with different length.** The relative abundance (sum of expression values) of sncdRNAs with a distinct length originating from a specific type of small ncRNA is plotted on the Y-axis as a percentage of the summed expression of all sncdRNAs originating from that type of small ncRNA in each sequencing library.

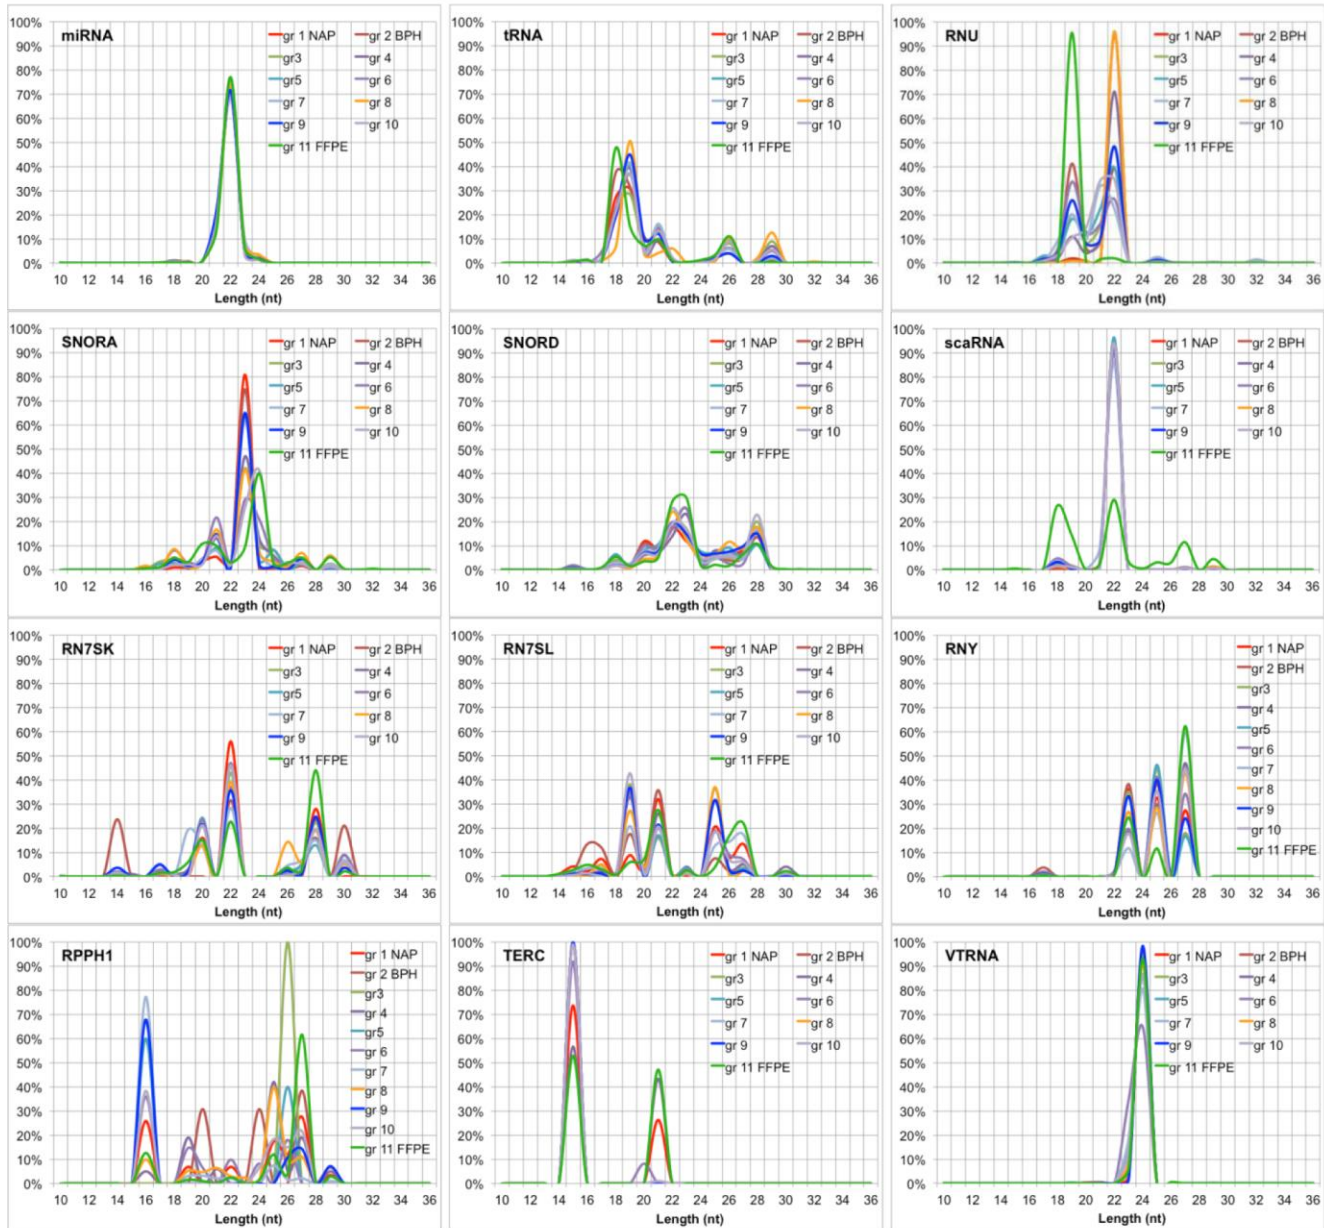

Summed expression of sncdRNAs originating from each precursor corresponding to 100%

|             | MIR        | RN7SK | RN7SL | RNU       | RNY    | RPPH1 | SCARNA | SNORA  | SNORD   | TERC | TRNA      | VTRNA  | Total per group   |
|-------------|------------|-------|-------|-----------|--------|-------|--------|--------|---------|------|-----------|--------|-------------------|
| <b>gr1</b>  | 11 283 960 | 25    | 194   | 10 805    | 21 111 | 58    | 13 190 | 4 651  | 36 306  | 19   | 174 186   | 2 038  | <b>11 546 543</b> |
| <b>gr2</b>  | 10 714 251 | 38    | 524   | 1482      | 30 396 | 13    | 14 296 | 2 842  | 36 241  | 14   | 770 118   | 3 425  | <b>11 573 640</b> |
| <b>gr3</b>  | 10 084 596 | 2 099 | 784   | 6099      | 40 152 | 4     | 12 492 | 8 277  | 144 413 | 12   | 249 622   | 22 626 | <b>10 571 176</b> |
| <b>gr4</b>  | 9 954 116  | 1 331 | 800   | 13 554    | 35 231 | 81    | 18 621 | 8 315  | 157 886 | 30   | 243 321   | 18 583 | <b>10 451 869</b> |
| <b>gr5</b>  | 10 643 298 | 403   | 424   | 2 275     | 21 809 | 15    | 14 155 | 7 354  | 93 358  | 10   | 143 655   | 4 269  | <b>10 931 025</b> |
| <b>gr6</b>  | 11 041 835 | 3 085 | 2 351 | 7 044     | 24 537 | 61    | 20 026 | 11 465 | 157 647 | 49   | 209 809   | 15 121 | <b>11 493 030</b> |
| <b>gr7</b>  | 10 476 280 | 134   | 1 143 | 5 437     | 26 492 | 189   | 24 771 | 7 596  | 107 036 | 13   | 253 424   | 4 762  | <b>10 907 277</b> |
| <b>gr8</b>  | 9 125 650  | 1 901 | 1 527 | 135 742   | 38 842 | 171   | 21 998 | 8 021  | 182 988 | 47   | 489 084   | 8 010  | <b>10 013 981</b> |
| <b>gr9</b>  | 10 760 596 | 557   | 635   | 2 598     | 22 354 | 28    | 12 346 | 6 541  | 110 517 | 55   | 246 353   | 15 512 | <b>11 178 092</b> |
| <b>gr10</b> | 9 222 102  | 2 522 | 986   | 8 543     | 25 806 | 60    | 12 522 | 10 447 | 113 619 | 515  | 201 637   | 10 462 | <b>9 609 221</b>  |
| <b>gr11</b> | 1 857 603  | 1 900 | 5 222 | 1 723 358 | 20 555 | 2 558 | 9 974  | 49 866 | 274 521 | 176  | 1 467 826 | 6 250  | <b>5 419 809</b>  |

Supplementary figure 8. Differential expression of miRNAs and snclRNAs between fresh frozen (FF) and FFPE samples.

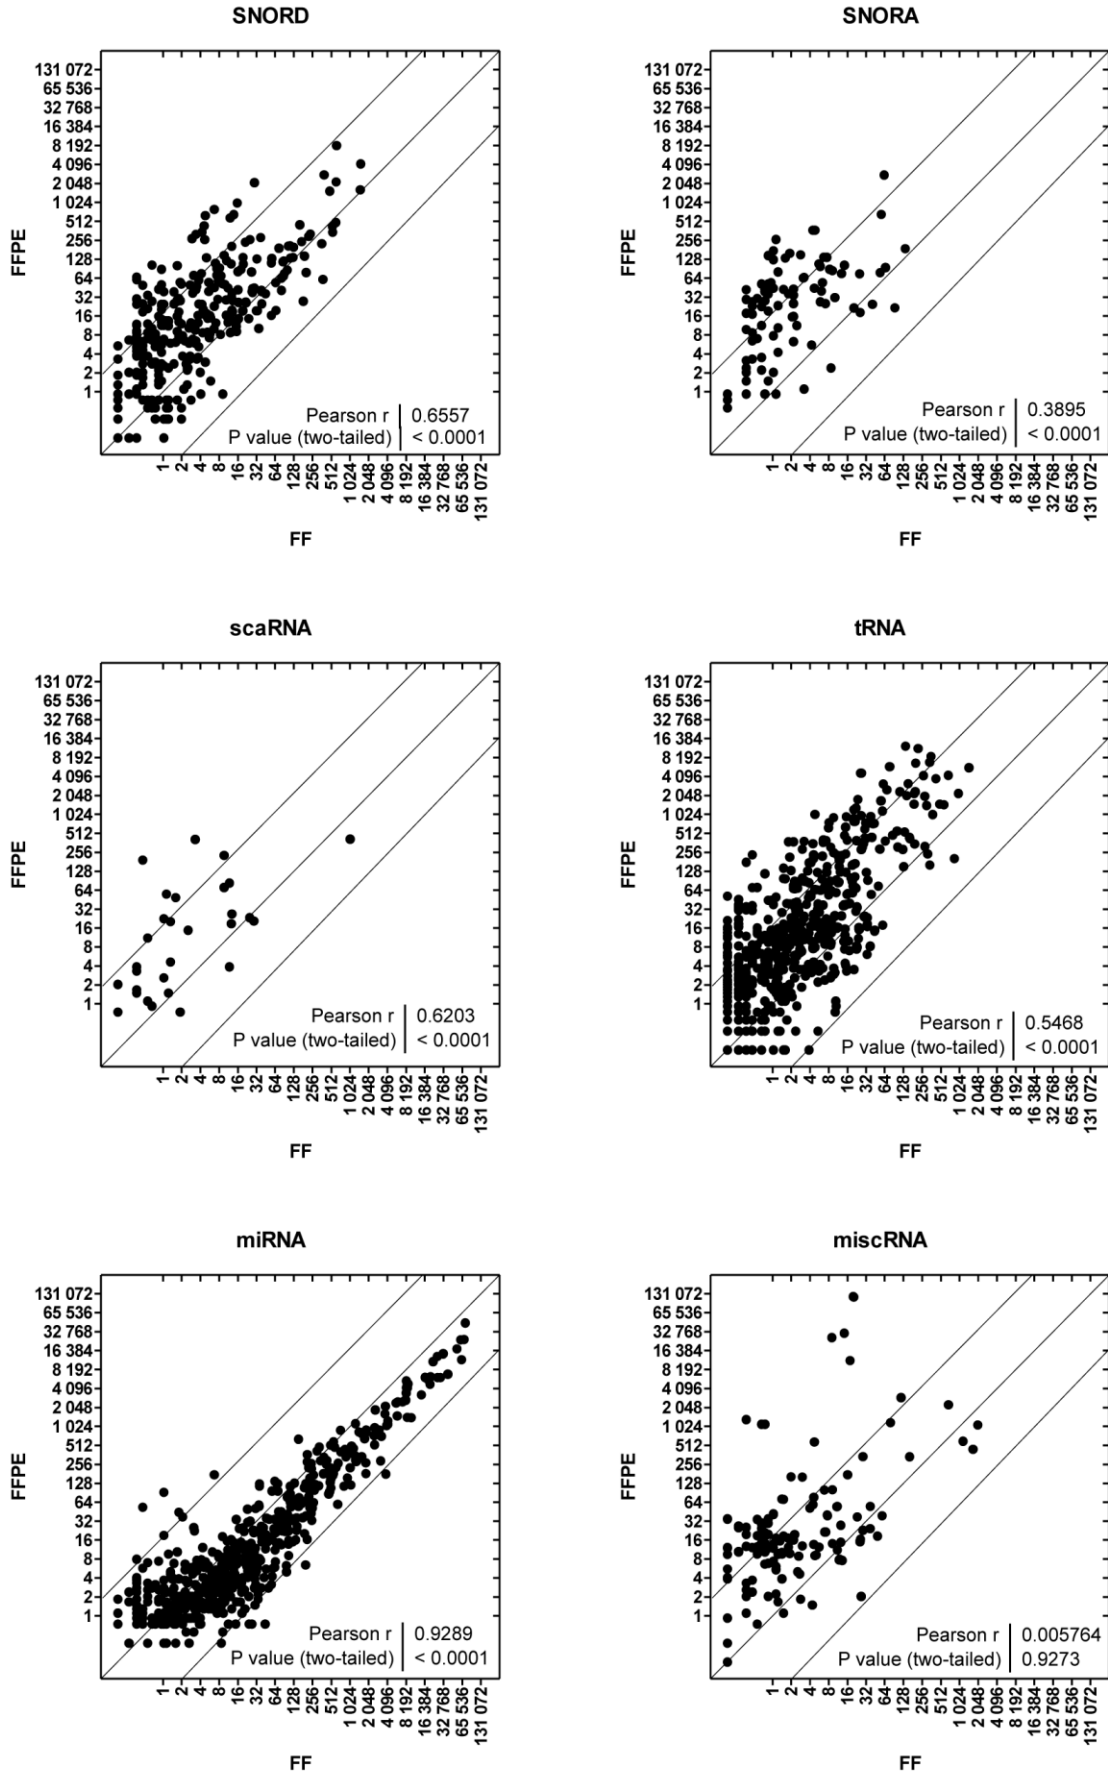

**Supplementary figure 9.** a) Expression of sdrRNAs originating from CD-box snoRNAs encoded in the introns of the GAS5 gene from RNA-Seq data. b) Expression of full length SNORD74, SNORD44, SNORD78, SNORD81 and their sdrRNAs measured by Quantitative RT-PCR with custom LNA primers.

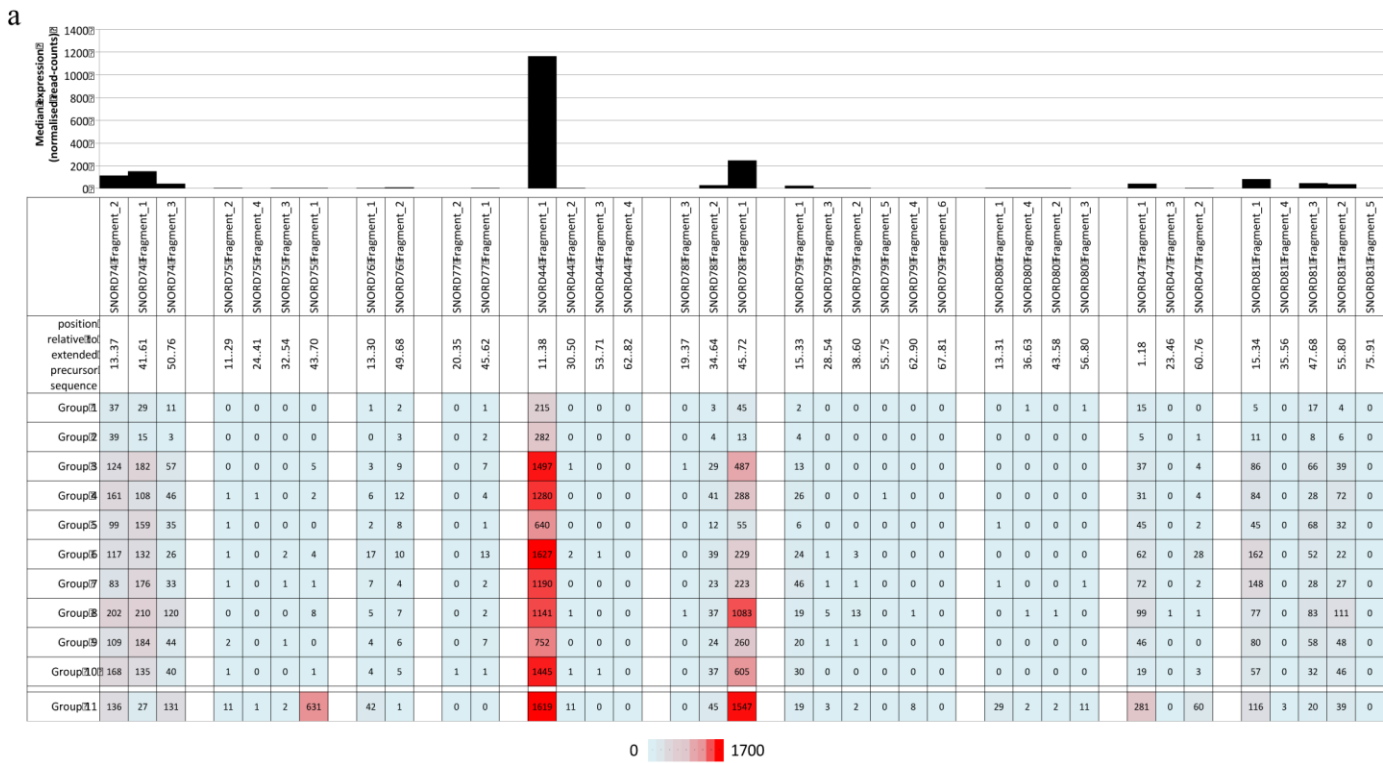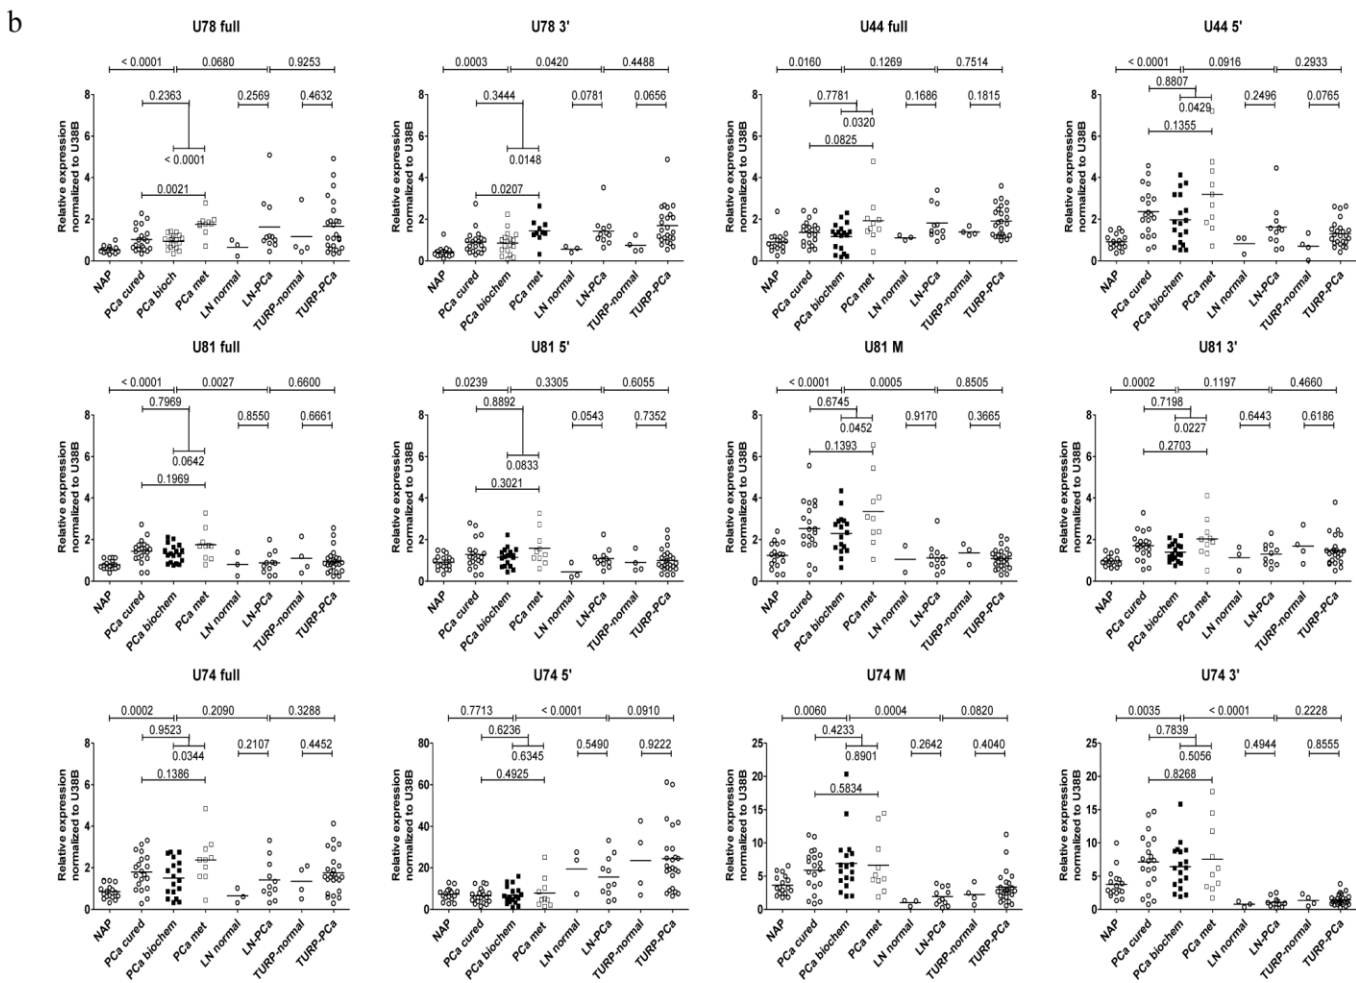

**Supplementary figure 10. Overview of primary alignments of sequence reads mapping to SNORD74, SNORD44, SNORD78, and SNORD81.** Each line represents a unique sequence read. Note the different fragmentation patterns of U74 and U81 compared to U44 and U78.

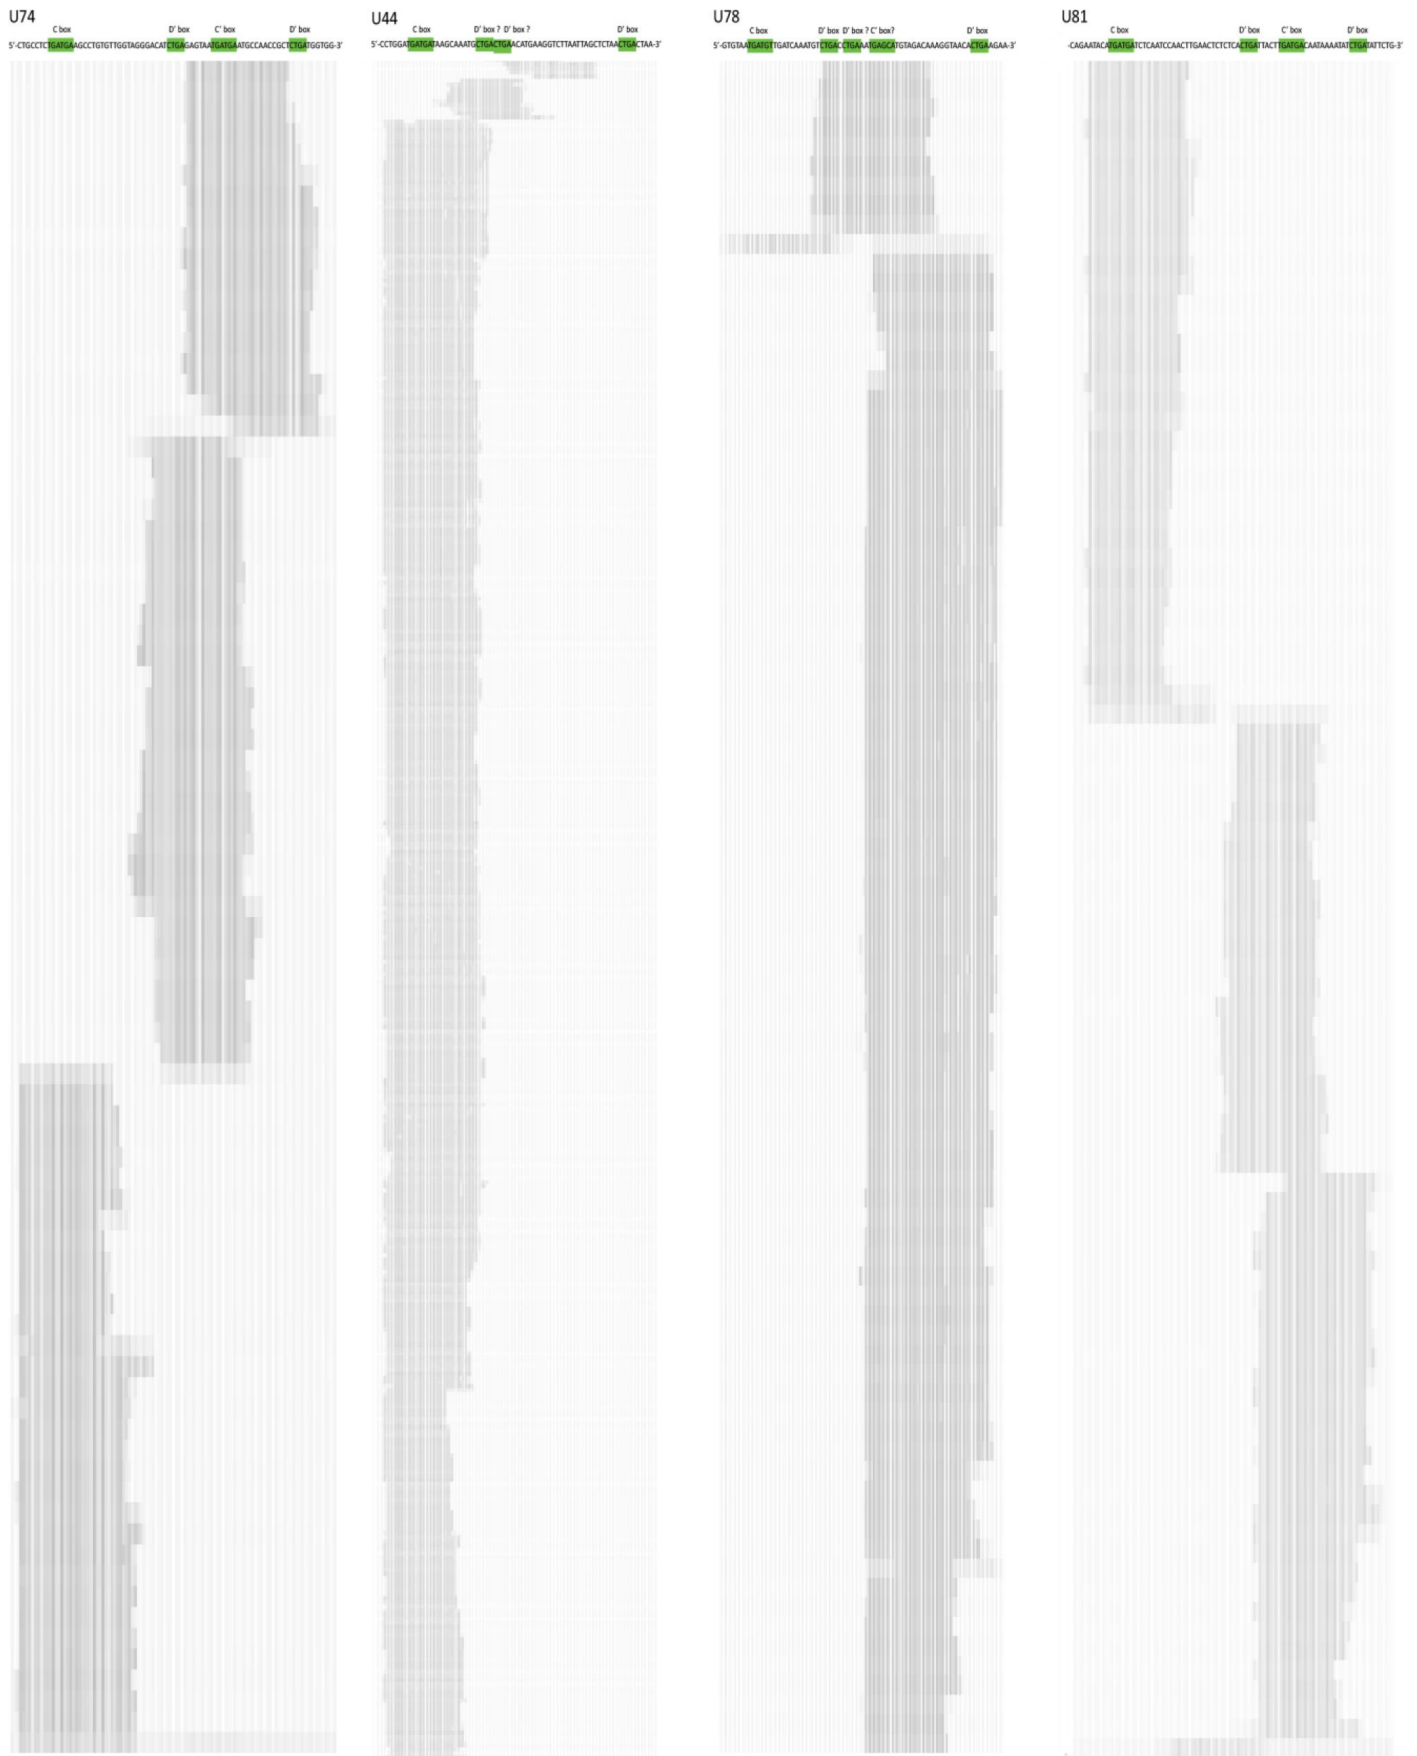



**Supplementary figure 11. Expression of sd78-3', SNORD78, and GAS5 in prostate cancer cell lines and cell lines derived from normal basal prostate epithelium.** Expression of sd78-3' and SNORD78 was measured using custom LNA primer assays listed in Supplementary methods table M1 and standard LNA qPCR kits (Exiqon, Copenhagen, Denmark) according to the manufacturers instructions. Expression values of sd78-3' and SNORD78 were normalized the expression of SNORD38B reference small RNA measured with Reference gene primer set 20391 (Exiqon, Copenhagen, Denmark). Spliced GAS5 transcript expression levels were assessed by the Reverse Transcription System (Promega Benelux, The Netherlands) followed by SybrGreen qPCR (Roche, The Netherlands) according to manufacturer protocols. Primers used were GAS5 FW: CAAGGACTCAGAATTCATGAT and GAS5 REV: AGTGGTCTTTGTAGACTGCC. Raw expression values were normalized against the geometrical mean of GAPDH and PBGD. Data represents the average expression of tested RNAs in two independent biological replicates of non-consecutive cell passages. Error bars represent standard deviation.

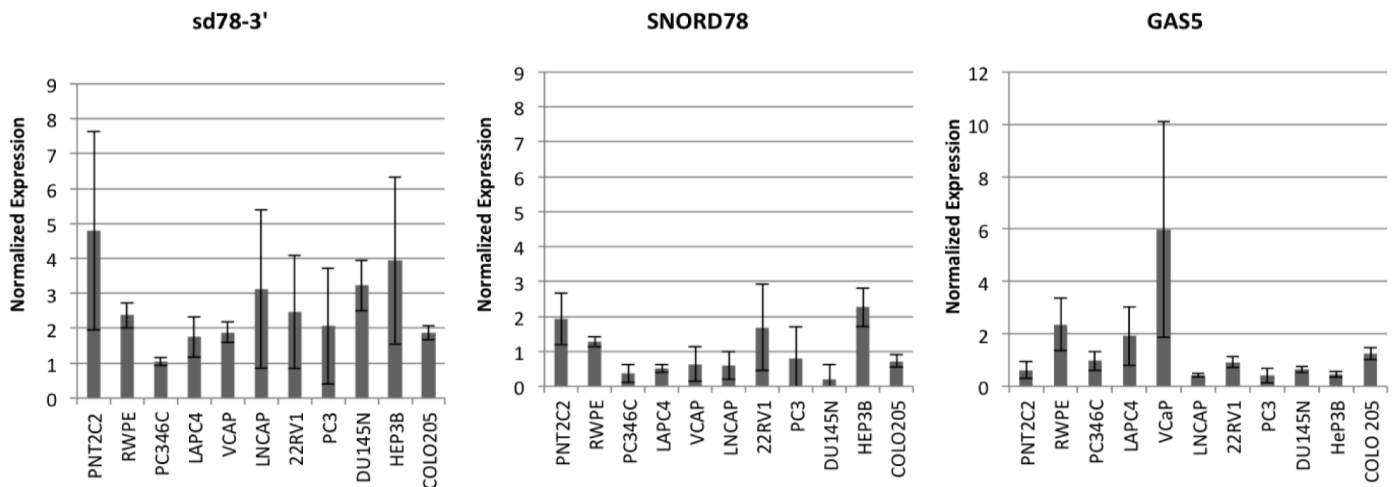

Supplement: oncotarget-06-17430-s001.pdf [file oncotarget-06-17430-s001.pdf]
