# Supplementary material for: C/D-box snoRNA-derived RNA production is associated with malignant transformation and metastatic progression in prostate cancer
Source: PubMed Central journal article supplement (PMC4627319; doi:10.18632/oncotarget.4172), 2015-05-19

seq-read positions of C/D-box sdRNAs

C/D-box snoRNA

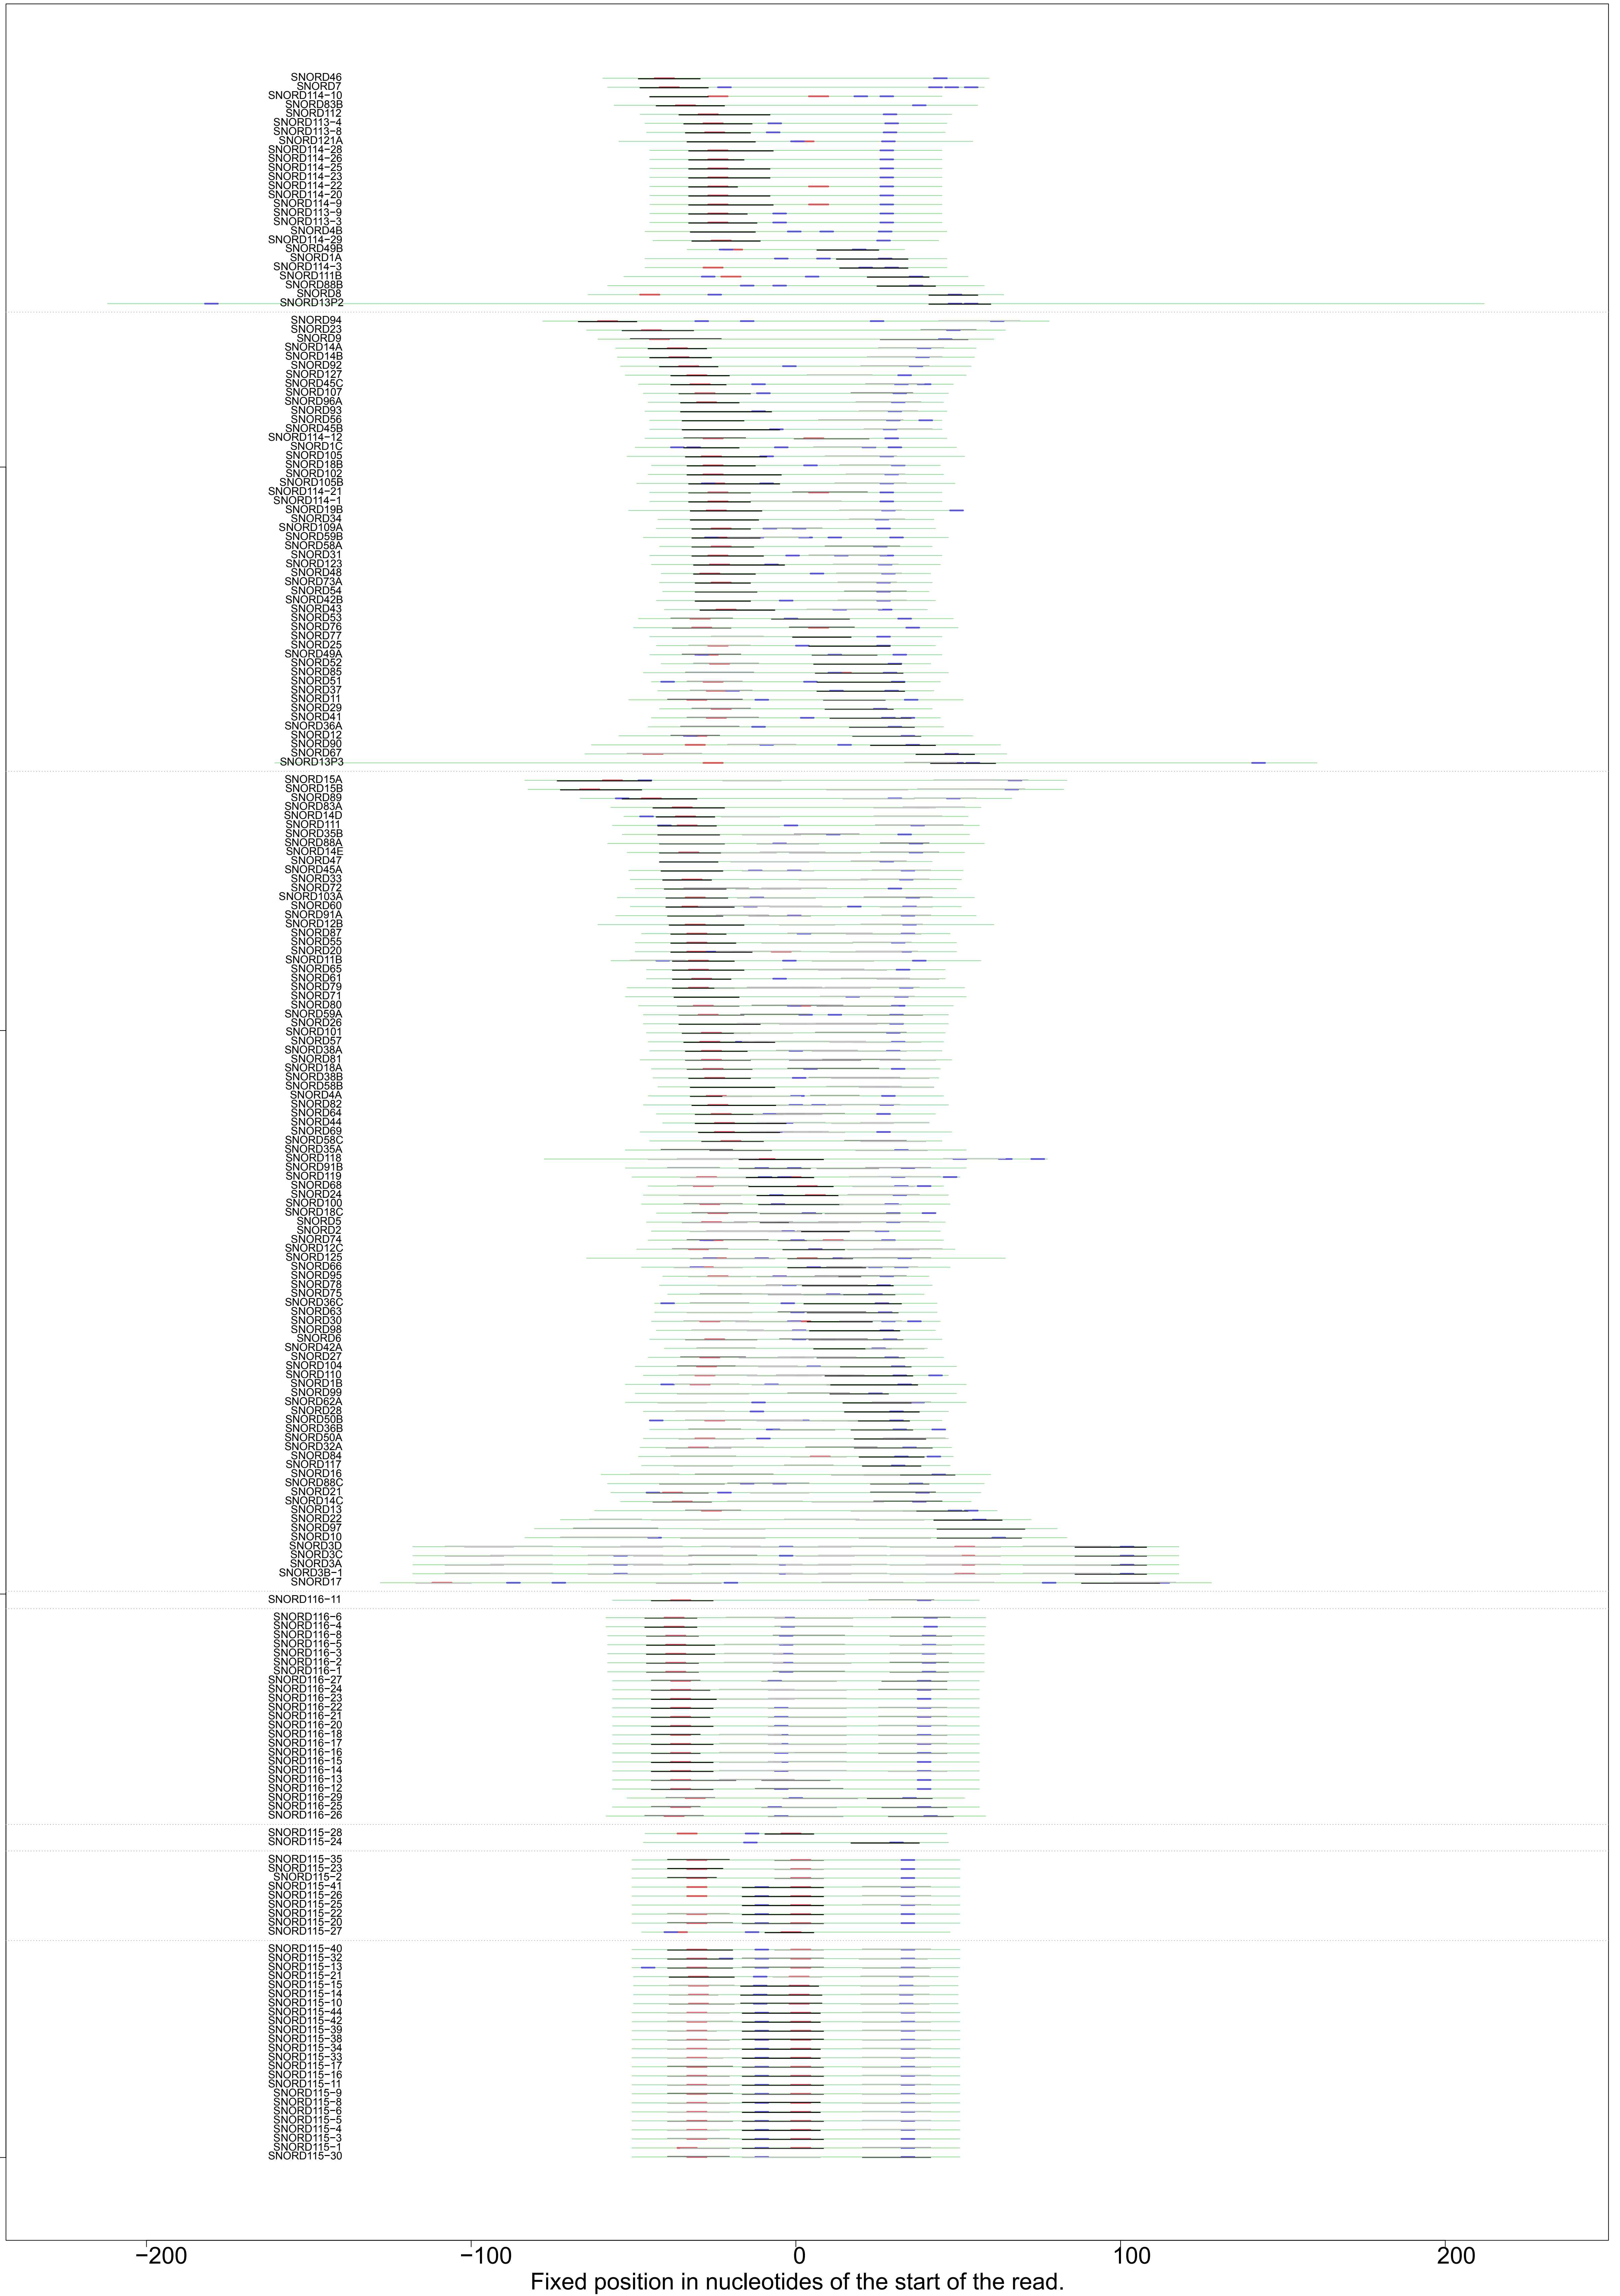

Supplement: oncotarget-06-17430-s005.pdf [file oncotarget-06-17430-s005.pdf]
